# Supplementary material
Source: HighWire-hosted journal article supplement (https://www.jrheum.org/highwire/filestream/32718/field_highwire_adjunct_files/0/170266DataSuppl.pdf)
Supplement: 170266DataSuppl.pdf [file 170266DataSuppl.pdf]

## ONLINE SUPPLEMENTARY DATA

**Supplementary Table 1. The micro-RNA included in the study.**

| hsa-miRNA         | Relevance                                                                                                                                                                                                                                                       | Reference  |
|-------------------|-----------------------------------------------------------------------------------------------------------------------------------------------------------------------------------------------------------------------------------------------------------------|------------|
| <i>miR-1-3p</i>   | Regulate Toll-like receptor 4 (TLR4)                                                                                                                                                                                                                            | (1)        |
| <i>miR-7-5p</i>   |                                                                                                                                                                                                                                                                 |            |
| <i>let-7a-5p</i>  | Directly Inhibits Expression of interleukin-6 (IL-6) <sup>a b c</sup>                                                                                                                                                                                           | (2)        |
| <i>let-7b-5p</i>  |                                                                                                                                                                                                                                                                 |            |
| <i>let-7c</i>     | Regulates dendritic cell activation                                                                                                                                                                                                                             | (3)        |
| <i>let-7d-5p</i>  |                                                                                                                                                                                                                                                                 |            |
| <i>let-7e-5p</i>  | Down-regulates Toll-like receptor 4 (TLR4) <sup>a b</sup>                                                                                                                                                                                                       | (4)        |
| <i>let-7i-5p</i>  | Regulates TLR4 expression in cholangiocytes <sup>a b c</sup>                                                                                                                                                                                                    | (5)        |
| <i>miR-10a-5p</i> |                                                                                                                                                                                                                                                                 | (6)        |
| <i>miR-10b-5p</i> |                                                                                                                                                                                                                                                                 |            |
| <i>miR-15a</i>    | Down in arthritic synovial tissue, apoptosis regulator. Regulates expression of inhibitor of nuclear factor $\kappa$ -B kinase subunit $\alpha$ <sup>a b c</sup> ( <i>CHUK</i> ) and IFN- $\gamma$ ( <i>IFNG</i> ).                                             | (7-9)      |
| <i>miR-15b-5p</i> | <i>miR-15/16</i> family specifically targets the IFN- $\gamma$ 3'UTR <sup>a b</sup>                                                                                                                                                                             | (9)        |
| <i>miR-16</i>     | Increased in PBMC from RA patients. Regulates expression of <i>CHUK</i> <sup>a b c</sup> and <i>IFNG</i> .                                                                                                                                                      | (7-12)     |
| <i>miR-17-5p</i>  | Part of the polycistronic <i>miR-17-92</i> family involved in monocytopoiesis. Down in SLE PBMCs                                                                                                                                                                | (11-13)    |
| <i>miR-18a-5p</i> |                                                                                                                                                                                                                                                                 |            |
| <i>miR-19a-3p</i> | <i>miR-19a</i> and <i>miR-19b</i> regulate IL-6 and MMP3 release by controlling TLR2 expression <sup>a b c</sup> . Down in RA FLS.                                                                                                                              | (14)       |
| <i>miR-19b-3p</i> | See above                                                                                                                                                                                                                                                       | (14)       |
| <i>miR-20a</i>    | Part of the polycistronic <i>miR-17-92</i> family involved in monocytopoiesis. Down in EBV-transformed B-cell lines from SLE patients.                                                                                                                          | (13;15;16) |
| <i>miR-21</i>     | Upregulated in SLE PBMCs, targets <i>PDCD4</i> and thereby negatively regulating TLR4 signaling                                                                                                                                                                 | (7;13;17)  |
| <i>miR-22-3p</i>  | Down in RA synovial tissue. Regulates RA FLS proliferation and IL-6 production. Suggested as predictor of anti-TNF response in RA patients.                                                                                                                     | (18;19)    |
| <i>miR-23a-3p</i> | Suggested as predictor of anti-TNF response in RA patients                                                                                                                                                                                                      | (20)       |
| <i>miR-23b-3p</i> | Represses autoimmune inflammation by targeting TGF- $\beta$ -activated kinase 1/MAP3K7 binding protein 2 ( <i>TAB2</i> ), <i>TAB3</i> and inhibitor of nuclear factor $\kappa$ -B kinase subunit $\alpha$ ( <i>IKK-<math>\alpha</math> /CHUK</i> ) <sup>b</sup> | (21)       |
| <i>miR-24</i>     | Down in EBV-transformed B-cell lines from SLE patients                                                                                                                                                                                                          | (15)       |
| <i>miR-26a-5p</i> |                                                                                                                                                                                                                                                                 |            |
| <i>miR-26b-5p</i> | Associated with etanercept response in psoriasis patients. Regulates <i>IFNG</i> , <i>TNFAIP3</i> and <i>TLR1</i> .                                                                                                                                             | (22;23)    |
| <i>miR-27a-3p</i> | Attenuates NK-cell cytotoxicity. Down-regulates TNF- $\alpha$ , IL-1b, IL-6, IL-12 and IL-23 through MAPK signaling pathway.                                                                                                                                    | (24;25)    |
| <i>miR-27b-3p</i> |                                                                                                                                                                                                                                                                 |            |
| <i>miR-28-3p</i>  |                                                                                                                                                                                                                                                                 |            |

|                   |                                                                                                                                                                                                                                                                                       |                       |
|-------------------|---------------------------------------------------------------------------------------------------------------------------------------------------------------------------------------------------------------------------------------------------------------------------------------|-----------------------|
| miR-29a           | Epigenetic regulation. Decreases DNA-methylation, decreases IFN- $\alpha$ receptor expression                                                                                                                                                                                         | (13;26)               |
| miR-29b-3p        | In a regulatory feedback loop with IFN- $\gamma$ . Regulates IFN- $\gamma$ via a direct interaction with the 3' UTR, and IFN- $\gamma$ itself enhances miR-29b expression <sup>b</sup> . Regulate progranulin (GRN) <sup>abcf</sup> . Interacts with TLR.                             | (27-29)               |
| miR-29c-3p        | Interacts with TLR                                                                                                                                                                                                                                                                    | (29)                  |
| <i>miR-31-5p</i>  |                                                                                                                                                                                                                                                                                       |                       |
| miR-34a           | Expressed by DCs and B cells, promotes DC differentiation                                                                                                                                                                                                                             | (13;30)               |
| miR-92a           | Part of the polycistronic miR-17 -92 family involved in monocytopoiesis. Down in SLE and SSc plasma.                                                                                                                                                                                  | (16;31)               |
| <i>miR-92b-5p</i> |                                                                                                                                                                                                                                                                                       |                       |
| miR-98-5p         |                                                                                                                                                                                                                                                                                       | (32)                  |
| miR-100-5p        | Predicted interaction with <i>NLRP3</i>                                                                                                                                                                                                                                               | (33)                  |
| miR-101           | Degradation of mRNA by Roquin (a protein that acts as a post-transcriptional repressor of mRNAs containing conserved stem loop motifs (constitutive decay elements (CDE)))                                                                                                            | (12;34)               |
| miR-103a-3p       |                                                                                                                                                                                                                                                                                       |                       |
| <i>miR-105-5p</i> | Modulator of TLR-2 protein translation in human gingival keratinocytes <sup>abc</sup>                                                                                                                                                                                                 | (35)                  |
| miR-106a-5p       | Part of the polycistronic miR-17 -92 family involved in monocytopoiesis. Down in SLE and SSc plasma.                                                                                                                                                                                  | (16;31)               |
| miR-106b-5p       | Regulate TLR2 expression <sup>e</sup> . Associated with etanercept response in psoriasis patients.                                                                                                                                                                                    | (22;36)               |
| miR-107           | Regulates progranulin (GRN) expression <sup>bce</sup>                                                                                                                                                                                                                                 | (37)                  |
| <i>miR-122-5p</i> |                                                                                                                                                                                                                                                                                       |                       |
| miR-125a-3p       | Upregulated in SLE PBMCs. Regulate <i>TNFAIP3</i> expression <sup>ac</sup> .                                                                                                                                                                                                          | (15;38)               |
| miR-125b          | Targets TNF- $\alpha$ , TLR signaling. Regulate <i>TNFAIP3</i> expression <sup>ac</sup> .                                                                                                                                                                                             | (12;38-40)            |
| miR-126-3p        | Associated with etanercept response in psoriasis patients.                                                                                                                                                                                                                            | (22)                  |
| <i>miR-126-5p</i> |                                                                                                                                                                                                                                                                                       |                       |
| miR-128-3p        | Target <i>PDE3A</i> <sup>e</sup> , which have been associated with anti-TNF response.                                                                                                                                                                                                 | (41;42)               |
| miR-132-3p        | Upregulated in RA PBMCs                                                                                                                                                                                                                                                               | (7;10-12)             |
| miR-133a-3p       | Controls inflammasome activation                                                                                                                                                                                                                                                      | (43)                  |
| miR-142-3p        | Up in SLE PBMCs and plasma, down in SSc, up in RA FLS. Associated with etanercept response in psoriasis patients.                                                                                                                                                                     | (7;11;13;15;22;44)    |
| miR-145-5p        | Target Toll-interleukin-1 receptor domain-containing adaptor protein ( <i>TIRAP</i> ). Decreased in SLE T-cells                                                                                                                                                                       | (45;46)               |
| miR-146a          | Down in SLE PBMCs. Target TLR4 <sup>abcef</sup> and <i>TIRAP</i> <sup>c</sup> . Inflammatory responses to TLR4, TLR2, and TLR5 ligands were reduced due to knockdown of miR-146a targets IL-1R-associated kinase 1 or TNFR-associated factor 6                                        | (7;10-13;45;47;48)    |
| miR-146b          | Down in SLE PBMCs                                                                                                                                                                                                                                                                     | (11;13)               |
| <i>miR-147b</i>   | Regulates murine macrophage inflammatory responses                                                                                                                                                                                                                                    | (49)                  |
| miR-150           | Represses MYB and blocks B-cell development                                                                                                                                                                                                                                           | (12;13;15)            |
| miR-155           | TLR signaling, IgG class switch, germinal center response, expressed in lymphocytes, macrophages, and DCs. Regulator of myeloid differentiation primary response gene 88 (MyD88) <sup>c</sup> . Target <i>PDE3A</i> <sup>e</sup> , which have been associated with anti-TNF response. | (7;10-13;39;41;42;50) |
| miR-181a          | Expressed by T cells, involved in T cell development, enhances TCR signaling.                                                                                                                                                                                                         | (11-13;15;51)         |

|                    |                                                                                                                                                                                                                                                                             |                         |
|--------------------|-----------------------------------------------------------------------------------------------------------------------------------------------------------------------------------------------------------------------------------------------------------------------------|-------------------------|
| miR-181b           | Regulates Ig class switch recombination in activated B cells, downregulates activation-induced cytidine deaminase (AID). Increased in SSc plasma, especially in dcSSc                                                                                                       | (12;52)                 |
| miR-184            | Down in SLE PBMCs                                                                                                                                                                                                                                                           | (7;11)                  |
| miR-192-5p         | Pro-apoptotic                                                                                                                                                                                                                                                               | (53)                    |
| miR-193b-3p        |                                                                                                                                                                                                                                                                             |                         |
| miR-199a-3p        | regulator of IKK $\beta$ ( <i>IKBKB</i> ) expression <sup>a b c</sup>                                                                                                                                                                                                       | (54)                    |
| miR-200a-3p        | Promotes Th17 differentiation                                                                                                                                                                                                                                               | (55)                    |
| <i>miR-200b-3p</i> | Inhibits TLR4 pathway factors                                                                                                                                                                                                                                               | (56)                    |
| miR-203            | Downregulated by EBV, upregulated in RA synovium. Down in SLE plasma. Down-regulating MyD88 by targeting the 3'UTR <sup>a b c</sup> .                                                                                                                                       | (7;11;31;57;58)         |
| miR-206            | Inversely correlated with number of circulating Th17 cells in dermatomyositis                                                                                                                                                                                               | (59)                    |
| miR-208a           |                                                                                                                                                                                                                                                                             |                         |
| miR-208b-3p        |                                                                                                                                                                                                                                                                             |                         |
| miR-218-5p         | Down-regulating IKK $\beta$ expression by directly targeting the 3'-UTR <sup>a b c</sup>                                                                                                                                                                                    | (60)                    |
| miR-221            | Expressed in hematopoietic stem cells, targets expression of the KIT genes. Directs TNF- $\alpha$ mRNA degradation                                                                                                                                                          | (7;13;61)               |
| miR-223            | Upregulated in T-lymphocytes from RA patients, targets E2F1 and CEBPa. Regulator of NLRP3 inflammasome by targeting the 3'-UTR. Regulate IKK $\alpha$ ( <i>CHUK</i> ). Suggested as biomarker and predictor of anti-TNF response in psoriasis and RA patients, respectively | (7;8;10;12;15;20;22;62) |
| miR-224-5p         | Increased in SLE circulating T-cells                                                                                                                                                                                                                                        | (46)                    |
| miR-335-5p         | Targets <i>IL17A</i> , <i>TLR1</i> , <i>TLR2</i> , <i>TLR4</i> , <i>IKBKB</i> <sup>e</sup> .                                                                                                                                                                                | (63).                   |
| miR-342-3p         | Upregulated/downregulated in SLE PBMCs. Decreased in SSc plasma, especially in dcSSc.                                                                                                                                                                                       | (7;11;15;52)            |
| <i>miR-346</i>     | Targets TNF-a, TLR signaling. Regulate IL-18 release in LPS-activated RA FLS <sup>b c d</sup> .                                                                                                                                                                             | (7;40;64)               |
| miR-363            | Downregulated in RA T cells                                                                                                                                                                                                                                                 | (7;65)                  |
| <i>miR-369-3p</i>  |                                                                                                                                                                                                                                                                             | (61)                    |
| miR-375            | Up-regulates caspase recruitment domain family, member 8 ( <i>CARD8</i> ) <sup>e</sup> (cancer cell line)                                                                                                                                                                   | (66)                    |
| miR-378a-5p        |                                                                                                                                                                                                                                                                             |                         |
| miR-383            | Down in SLE PBMCs                                                                                                                                                                                                                                                           | (7;11)                  |
| <i>miR-409-3p</i>  | Down in SLE PBMCs. Targets <i>IFNG</i> (interferon- $\gamma$ ) <sup>b</sup>                                                                                                                                                                                                 | (7;11;67)               |
| miR-423-5p         | Upregulated in SLE PBMCs, targets genes activated in IFN signaling                                                                                                                                                                                                          | (7;15)                  |
| miR-451a           | Down-regulates neutrophil chemotaxis via p38 MAPK. Down in RA plasma. Correlated with RA disease activity.                                                                                                                                                                  | (68-70)                 |
| <i>miR-498</i>     | Down in RA synovium                                                                                                                                                                                                                                                         | (7)                     |
| <i>miR-499-5p</i>  |                                                                                                                                                                                                                                                                             |                         |
| mir-579-3p         | Inhibit translation of TNF- $\alpha$ mRNA                                                                                                                                                                                                                                   | (61)                    |
| miR-590-5p         | Regulates TGF- $\beta$ and TGF- $\beta$ RII expression                                                                                                                                                                                                                      | (71)                    |
| miR-638            | Up in SLE peripheral blood cells                                                                                                                                                                                                                                            | (7;15;72)               |
| miR-659-3p         | A common loss-of-function genetic variant (rs5848) in progranulin (GRN) is located in binding site for miR-659                                                                                                                                                              | (73)                    |
| <i>Cel-miR-238</i> | <i>Synthetic spike control</i>                                                                                                                                                                                                                                              |                         |
| <i>Cel-miR-54</i>  | <i>Synthetic spike control</i>                                                                                                                                                                                                                                              |                         |

Micro-RNA target interaction assessed by: <sup>a</sup> qRT-PCR, <sup>b</sup> Luciferase reporter assay, <sup>c</sup> Western blot, <sup>d</sup> Northern blot, <sup>e</sup> Microarray, <sup>f</sup> ELISA. MicroRNAs in italic were not analyzable in our study.

**Supplementary Table 2. The 93 TaqMan micro-RNA Assays**

| miRBase ID     | Assay Name     | Assay ID | Mature miRNA sequence   |
|----------------|----------------|----------|-------------------------|
| hsa-miR-1      | hsa-miR-1      | 002222   | UGGAAUGUAAAGAAGUAUGUAU  |
| hsa-miR-7-5p   | dme-miR-7      | 000268   | UGGAAGACUAGUGAUUUUGUUGU |
| hsa-let-7a-5p  | hsa-let-7a-5p  | 000377   | UGAGGUAGUAGGUUGUAUAGUU  |
| hsa-let-7b-5p  | hsa-let-7b     | 002619   | UGAGGUAGUAGGUUGUGUGGUU  |
| hsa-let-7c     | hsa-let-7c     | 000379   | UGAGGUAGUAGGUUGUAUGGUU  |
| hsa-let-7d-5p  | hsa-let-7d     | 002283   | AGAGGUAGUAGGUUGCAUAGUU  |
| hsa-let-7e-5p  | hsa-let-7e     | 002406   | UGAGGUAGGAGGUUGUAUAGUU  |
| hsa-let-7i-5p  | hsa-let-7i     | 002221   | UGAGGUAGUAGUUUGUGCUGUU  |
| hsa-miR-10a-5p | hsa-miR-10a    | 000387   | UACCCUGUAGAUCCGAAUUUGUG |
| hsa-miR-10b-5p | hsa-miR-10b    | 002218   | UACCCUGUAGAACCGAAUUUGUG |
| hsa-miR-15a    | hsa-miR-15a    | 000389   | UAGCAGCACAUAAUGGUUUGUG  |
| hsa-miR-15b-5p | hsa-miR-15b-5p | 000390   | UAGCAGCACAUCAUGGUUUACA  |
| hsa-miR-16     | hsa-miR-16     | 000391   | UAGCAGCACGUAAAUAUUGGCG  |
| hsa-miR-17-5p  | hsa-miR-17     | 002308   | CAAAGUGCUUACAGUGCAGGUAG |
| hsa-miR-18a-5p | hsa-miR-18a-5p | 002422   | UAAGGUGCAUCUAGUGCAGAUAG |
| hsa-miR-19a-3p | hsa-miR-19a    | 000395   | UGUGCAAUUCUAUGCAAACUGA  |
| hsa-miR-19b-3p | hsa-miR-19b    | 000396   | UGUGCAAUCCAUGCAAACUGA   |
| hsa-miR-20a    | hsa-miR-20a    | 000580   | UAAAGUGCUUAUAGUGCAGGUAG |
| hsa-miR-21     | hsa-miR-21     | 000397   | UAGCUUAUCAGACUGAUGUUGA  |
| hsa-miR-22-3p  | hsa-miR-22     | 000398   | AAGCUGCCAGUUGAAGAACUGU  |
| hsa-miR-23a-3p | hsa-miR-23a    | 000399   | AUCACAUUGCCAGGGAUUUCC   |
| hsa-miR-23b-3p | hsa-miR-23b    | 000400   | AUCACAUUGCCAGGGAUUACC   |
| hsa-miR-24     | hsa-miR-24     | 000402   | UGGCUCAGUUCAGCAGGAACAG  |
| hsa-miR-26a-5p | hsa-miR-26a    | 000405   | UUCAAGUAAUCCAGGAUAGGCU  |
| hsa-miR-26b-5p | hsa-miR-26b    | 000407   | UUCAAGUAAUUCAGGAUAGGU   |
| hsa-miR-27a-3p | hsa-miR-27a-3p | 000408   | UUCACAGUGGCUAAGUUCGCG   |
| hsa-miR-27b-3p | hsa-miR-27b    | 000409   | UUCACAGUGGCUAAGUUCUGC   |
| hsa-miR-28-3p  | hsa-miR-28-3p  | 002446   | CACUAGAUUGUGAGCUCCUGGA  |
| hsa-miR-29a    | hsa-miR-29a    | 002112   | UAGCACCAUCUGAAAUCGGUUA  |
| hsa-miR-29b-3p | hsa-miR-29b-3p | 000413   | UAGCACCAUUUGAAAUCAGUGUU |
| hsa-miR-29c-3p | hsa-miR-29c-3p | 000587   | UAGCACCAUUUGAAAUCGGUUA  |
| hsa-miR-31-5p  | hsa-miR-31-5p  | 002279   | AGGCAAGAUGCUGGCAUAGCU   |
| hsa-miR-34a    | hsa-miR-34a    | 000426   | UGGCAGUGUCUUAGCUGGUUGU  |
| hsa-miR-92a    | hsa-miR-92a    | 000431   | UAUUGCACUUGUCCGGCCUGU   |
| hsa-miR-92b-5p | hsa-miR-92b*   | 002343   | AGGGACGGGACGCGGUGCAGUG  |
| hsa-miR-98-5p  | hsa-miR-98     | 000577   | UGAGGUAGUAAGUUGUAUUGUU  |
| hsa-miR-100-5p | hsa-miR-100    | 000437   | AACCCGUAGAUCCGAACUUGUG  |

Online supplement to: Plasma MicroRNA Profiles in Patients with Early Rheumatoid Arthritis Responding to Adalimumab plus Methotrexate vs Methotrexate Alone: A Placebo-controlled Clinical Trial. *The Journal of Rheumatology*. doi:10.3899/jrheum.170266

|                 |                 |        |                          |
|-----------------|-----------------|--------|--------------------------|
| hsa-miR-101     | hsa-miR-101     | 002253 | UACAGUACUGUGUAACUGAA     |
| hsa-miR-103a-3p | hsa-miR-103a-3p | 000439 | AGCAGCAUUGUACAGGGCUAUGA  |
| hsa-miR-105-5p  | hsa-miR-105     | 002167 | UCAAUUGCUCAGACUCCUGUGGU  |
| hsa-miR-106a-5p | hsa-miR-106a    | 002169 | AAAAGUGCUACAGUGCAGGUAG   |
| hsa-miR-106b-5p | hsa-miR-106b    | 000442 | UAAAGUGCUGACAGUGCAGAU    |
| hsa-miR-107     | hsa-miR-107     | 000443 | AGCAGCAUUGUACAGGGCUAUCA  |
| hsa-miR-122-5p  | hsa-miR-122-5p  | 002245 | UGGAGUGUGACAAUGGUGUUUG   |
| hsa-miR-125a-5p | hsa-miR-125a-5p | 002198 | UCCCUGAGACCCUUUAACCUGUGA |
| hsa-miR-125b    | hsa-miR-125b    | 000449 | UCCCUGAGACCCUAAACUUGUGA  |
| hsa-miR-126-3p  | hsa-miR-126-3p  | 002228 | UCGUACCGUGAGUAAUAAUGCG   |
| hsa-miR-126-5p  | hsa-miR-126*    | 000451 | CAUUAUUACUUUUGGUACGCG    |
| hsa-miR-128-3p  | hsa-miR-128a    | 002216 | UCACAGUGAACCGGUCUCUUU    |
| hsa-miR-132-3p  | hsa-miR-132     | 000457 | UAACAGUCUACAGCCAUGGUCG   |
| hsa-miR-133a-3p | hsa-miR-133a    | 002246 | UUUGGUCCCCUUAACCAGCUG    |
| hsa-miR-142-3p  | hsa-miR-142-3p  | 000464 | UGUAGUGUUCCUACUUUAUGGA   |
| hsa-miR-145-5p  | hsa-miR-145-5p  | 002278 | GUCCAGUUUCCCAGGAAUCCCU   |
| hsa-miR-146a    | hsa-miR-146a    | 000468 | UGAGAACUGAAUCCAUGGGUU    |
| hsa-miR-146b-5p | hsa-miR-146b    | 001097 | UGAGAACUGAAUCCAUAGGCU    |
| hsa-miR-147b    | hsa-miR-147b    | 002262 | GUGUGCGGAAAUGCUUCUGCUA   |
| hsa-miR-150     | hsa-miR-150     | 000473 | UCUCCCAACCCUUGUACCAGUG   |
| hsa-miR-155     | hsa-miR-155     | 002623 | UUAAUGCUGAAUCGUGAUAGGGGU |
| hsa-miR-181a-5p | hsa-miR-181a    | 000480 | AACAUUCAACGCUGUCGGUGAGU  |
| dre-miR-181b    | hsa-miR-181b    | 001098 | AACAUUCAUUGCUGUCGGUGGG   |
| hsa-miR-184     | hsa-miR-184     | 000485 | UGGACGGAGAACUGAUAAAGGGU  |
| hsa-miR-192-5p  | hsa-miR-192-5p  | 000491 | CUGACCUAUGAAUUGACAGCC    |
| hsa-miR-193b-3p | hsa-miR-193b    | 002367 | AACUGGCCUCUCAAAGUCCCGCU  |
| hsa-miR-199a-3p | hsa-miR-199a-3p | 002304 | ACAGUAGUCUGCACAUUGGUUA   |
| hsa-miR-200a-3p | hsa-miR-200a    | 000502 | UAACACUGUCUGGUAACGAUGU   |
| hsa-miR-200b-3p | hsa-miR-200b    | 002251 | UAAUACUGCCUGGUAUUGAUGA   |
| hsa-miR-203     | hsa-miR-203     | 000507 | GUGAAAUGUUUAGGACCACUAG   |
| hsa-miR-206     | hsa-miR-206     | 000510 | UGGAAUGUAAGGAAGUGUGUGG   |
| hsa-miR-208a    | hsa-miR-208a    | 000511 | AUAAGACGAGCAAAAAGCUUGU   |
| hsa-miR-208b-3p | hsa-miR-208b    | 002290 | AUAAGACGAACAAAAGGUUUGU   |
| hsa-miR-218-5p  | hsa-miR-218     | 000521 | UUGUGCUUGAUCUAACCAUGU    |
| hsa-miR-221     | hsa-miR-221     | 000524 | AGCUACAUUGUCUGCUGGGUUUC  |
| hsa-miR-223     | hsa-miR-223     | 002295 | UGUCAGUUUGUCAAAUACCCCA   |
| hsa-miR-224-5p  | hsa-miR-224     | 002099 | CAAGUCACUAGUGGUUCCGUU    |
| hsa-miR-335-5p  | hsa-miR-335     | 000546 | UCAAGAGCAAUACGAAAAAUGU   |
| hsa-miR-342-3p  | hsa-miR-342-3p  | 002260 | UCUCACACAGAAAUCGCACCCGU  |

Online supplement to: Plasma MicroRNA Profiles in Patients with Early Rheumatoid Arthritis Responding to Adalimumab plus Methotrexate vs Methotrexate Alone: A Placebo-controlled Clinical Trial. *The Journal of Rheumatology*. doi:10.3899/jrheum.170266

|                 |                |        |                           |
|-----------------|----------------|--------|---------------------------|
| hsa-miR-346     | hsa-miR-346    | 000553 | UGUCUGCCCCGCAUGCCUGCCUCU  |
| hsa-miR-363-3p  | hsa-miR-363    | 001271 | AAUUGCACGGUAUCCAUCUGUA    |
| hsa-miR-369-3p  | hsa-miR-369-3p | 000557 | AAUAAUACAUGGUUGAUCUUU     |
| hsa-miR-375     | hsa-miR-375    | 000564 | UUUGUUCGUUCGGCUCGCGUGA    |
| hsa-miR-378a-5p | hsa-miR-378    | 000567 | CUCCUGACUCCAGGUCCUGUGU    |
| hsa-miR-383     | hsa-miR-383    | 000573 | AGAUCAGAAGGUGAUUGUGGCU    |
| hsa-miR-409-3p  | hsa-miR-409-3p | 002332 | GAAUGUUGCUCGGUGAACCCCU    |
| hsa-miR-423-5p  | hsa-miR-423-5p | 002340 | UGAGGGGCAGAGAGCGAGACUUU   |
| hsa-miR-451a    | hsa-miR-451a   | 001141 | AAACCGUUACCAUUACUGAGUU    |
| hsa-miR-498     | hsa-miR-498    | 001044 | UUUCAAGCCAGGGGGCGUUUUUC   |
| hsa-miR-499-5p  | mmu-miR-499    | 001352 | UUAAGACUUGCAGUGAUGUUU     |
| hsa-miR-579-3p  | hsa-miR-579    | 002398 | UUCAUUUGUAUAAACCGCGAUU    |
| hsa-miR-590-5p  | hsa-miR-590-5p | 001984 | GAGCUUAUUCAUAAAAGUGCAG    |
| hsa-miR-638     | hsa-miR-638    | 001582 | AGGGAUCGCGGGCGGGUGGCGGCCU |
| hsa-miR-659-3p  | hsa-miR-659    | 001514 | CUUGGUUCAGGGAGGGUCCCA     |
| cel-miR-238-3p  | cel-miR-238    | 000248 | UUUGUACUCCGAUGCCAUUCAGA   |
| cel-miR-54-3p   | cel-miR-54     | 001361 | UACCCGUAAUCUUCAUAAUCCGAG  |

**Supplementary Figure 1. Unsupervised hierarchical clustering plot based on all patients and miRNAs**

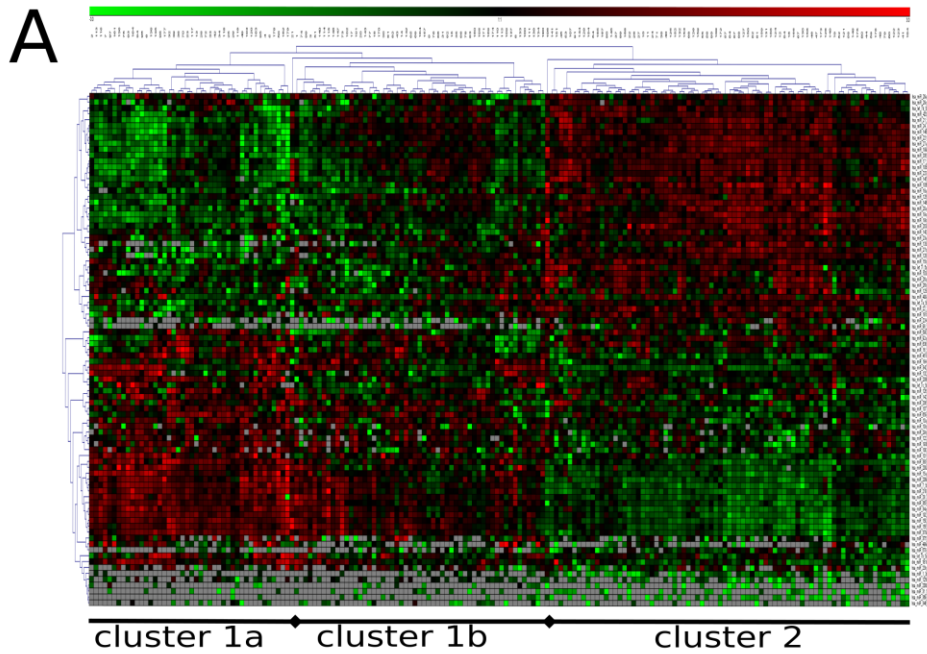

**B**

| Hospital     | cluster 1a | cluster 1b | cluster 2 | Total      |
|--------------|------------|------------|-----------|------------|
| A            | 0          | 4          | 14        | 18         |
| B            | 0          | 0          | 1         | 1          |
| C            | 3          | 5          | 4         | 12         |
| D            | 21         | 9          | 0         | 30         |
| E            | 0          | 0          | 1         | 1          |
| F            | 0          | 1          | 7         | 8          |
| G            | 0          | 1          | 25        | 26         |
| H            | 0          | 3          | 8         | 11         |
| I            | 0          | 1          | 0         | 1          |
| J            | 15         | 5          | 8         | 28         |
| K            | 0          | 1          | 0         | 1          |
| L            | 1          | 7          | 2         | 10         |
| M            | 0          | 0          | 2         | 2          |
| N            | 1          | 10         | 8         | 19         |
| O            | 3          | 9          | 0         | 12         |
| <b>Total</b> | <b>44</b>  | <b>56</b>  | <b>80</b> | <b>180</b> |

**Supplementary Table 3. Adalimumab group univariate analyses of association between pre-treatment micro-RNA and ACR/EULAR Boolean remission**

| hsa-miRNA            | 3m        |                   |             |             | 12m       |                   |              |             |
|----------------------|-----------|-------------------|-------------|-------------|-----------|-------------------|--------------|-------------|
|                      | Rank      | Regr. Coeff. ± SE | p-value     | q-value     | Rank      | Regr. Coeff. ± SE | p-value      | q-value     |
| <b>miR-27a-3p</b>    | <b>10</b> | <b>0.29±0.16</b>  | <b>0.08</b> | <b>0.64</b> | <b>1</b>  | <b>0.55±0.16</b>  | <b>0.001</b> | <b>0.06</b> |
| <b>miR-10b-5p</b>    | 15        | -0.71±0.47        | 0.14        | 0.67        | <b>2</b>  | <b>-1.38±0.46</b> | <b>0.004</b> | <b>0.12</b> |
| <b>miR-423-5p</b>    | 73        | -0.03±0.15        | 0.87        | 0.95        | <b>3</b>  | <b>0.44±0.15</b>  | <b>0.01</b>  | <b>0.12</b> |
| <b>miR-142-3p</b>    | 16        | -0.18±0.12        | 0.15        | 0.67        | <b>4</b>  | <b>-0.33±0.12</b> | <b>0.01</b>  | <b>0.12</b> |
| <b>miR-24-3p</b>     | 22        | 0.21±0.16         | 0.19        | 0.69        | <b>5</b>  | <b>0.44±0.16</b>  | <b>0.01</b>  | <b>0.12</b> |
| <b>miR-27b-3p</b>    | <b>4</b>  | <b>0.48±0.23</b>  | <b>0.04</b> | <b>0.56</b> | <b>6</b>  | <b>0.62±0.24</b>  | <b>0.01</b>  | <b>0.12</b> |
| <b>miR-23a-3p</b>    | 12        | 0.61±0.37         | 0.10        | 0.64        | <b>7</b>  | <b>0.95±0.37</b>  | <b>0.01</b>  | <b>0.12</b> |
| <b>miR-342-3p</b>    | 69        | -0.04±0.20        | 0.84        | 0.95        | <b>8</b>  | <b>-0.50±0.20</b> | <b>0.01</b>  | <b>0.12</b> |
| <b>miR-101-3p</b>    | 39        | -0.23±0.26        | 0.37        | 0.75        | <b>9</b>  | <b>-0.65±0.26</b> | <b>0.01</b>  | <b>0.12</b> |
| <b>miR-17-5p</b>     | 25        | 0.14±0.11         | 0.23        | 0.73        | <b>10</b> | <b>0.28±0.11</b>  | <b>0.02</b>  | <b>0.14</b> |
| <b>miR-223-3p</b>    | <b>11</b> | <b>0.21±0.12</b>  | <b>0.10</b> | <b>0.64</b> | <b>11</b> | <b>0.30±0.13</b>  | <b>0.02</b>  | <b>0.16</b> |
| <b>miR-19b-3p</b>    | <b>1</b>  | <b>0.41±0.16</b>  | <b>0.01</b> | <b>0.56</b> | <b>12</b> | <b>0.36±0.16</b>  | <b>0.03</b>  | <b>0.16</b> |
| <b>miR-221-3p</b>    | 42        | 0.15±0.18         | 0.42        | 0.8         | <b>13</b> | <b>0.42±0.18</b>  | <b>0.03</b>  | <b>0.16</b> |
| <b>miR-19a-3p</b>    | <b>2</b>  | <b>0.56±0.22</b>  | <b>0.01</b> | <b>0.56</b> | <b>14</b> | <b>0.52±0.23</b>  | <b>0.03</b>  | <b>0.16</b> |
| <b>miR-106a-5p</b>   | 45        | 0.09±0.12         | 0.46        | 0.8         | <b>15</b> | <b>0.26±0.12</b>  | <b>0.03</b>  | <b>0.18</b> |
| <b>miR-128-3p</b>    | 24        | 0.28±0.23         | 0.23        | 0.73        | <b>16</b> | <b>0.49±0.24</b>  | <b>0.04</b>  | <b>0.21</b> |
| <b>miR-10a-5p</b>    | <b>5</b>  | <b>-0.97±0.48</b> | <b>0.04</b> | <b>0.56</b> | <b>17</b> | <b>-0.96±0.49</b> | <b>0.05</b>  | <b>0.22</b> |
| <b>miR-16-5p</b>     | 61        | 0.07±0.16         | 0.65        | 0.86        | <b>18</b> | <b>0.30±0.15</b>  | <b>0.05</b>  | <b>0.22</b> |
| <b>miR-199a-b-3p</b> | <b>8</b>  | <b>0.40±0.21</b>  | <b>0.06</b> | <b>0.56</b> | <b>19</b> | <b>0.41±0.21</b>  | <b>0.05</b>  | <b>0.22</b> |
| <b>miR-146b-5p</b>   | 33        | -0.11±0.11        | 0.32        | 0.75        | <b>20</b> | <b>-0.22±0.11</b> | <b>0.06</b>  | <b>0.22</b> |
| <b>miR-29b-3p</b>    | <b>6</b>  | <b>-0.85±0.43</b> | <b>0.05</b> | <b>0.56</b> | <b>21</b> | <b>-0.83±0.44</b> | <b>0.06</b>  | <b>0.22</b> |
| <b>miR-146a-5p</b>   | 18        | 0.18±0.13         | 0.16        | 0.67        | <b>22</b> | <b>0.25±0.13</b>  | <b>0.06</b>  | <b>0.22</b> |
| <b>let-7a-5p</b>     | 17        | -0.49±0.34        | 0.16        | 0.67        | <b>23</b> | <b>-0.66±0.35</b> | <b>0.06</b>  | <b>0.22</b> |
| <b>miR-184</b>       | 23        | -0.23±0.18        | 0.20        | 0.69        | <b>24</b> | <b>-0.33±0.18</b> | <b>0.08</b>  | <b>0.26</b> |
| <b>miR-21-5p</b>     | 72        | 0.02±0.12         | 0.86        | 0.95        | <b>25</b> | <b>0.21±0.12</b>  | <b>0.09</b>  | <b>0.28</b> |
| miR-140-3p           | 67        | -0.07±0.25        | 0.79        | 0.94        | 26        | 0.42±0.25         | 0.10         | 0.31        |
| miR-29c-3p           | 27        | -0.29±0.26        | 0.26        | 0.75        | 27        | -0.43±0.26        | 0.11         | 0.31        |
| miR-18a-5p           | 57        | 0.19±0.35         | 0.59        | 0.83        | 28        | 0.56±0.36         | 0.12         | 0.33        |
| miR-579-3p           | 30        | 0.28±0.27         | 0.30        | 0.75        | 29        | 0.39±0.25         | 0.13         | 0.33        |
| miR-7-5p             | 59        | -0.07±0.15        | 0.63        | 0.86        | 30        | -0.24±0.15        | 0.13         | 0.33        |
| miR-92a-3p           | 62        | 0.04±0.11         | 0.70        | 0.91        | 31        | 0.15±0.10         | 0.14         | 0.33        |
| miR-26a-5p           | 36        | -0.10±0.11        | 0.35        | 0.75        | 32        | -0.17±0.11        | 0.14         | 0.33        |
| let-7i-5p            | 20        | -0.15±0.10        | 0.17        | 0.67        | 33        | -0.15±0.10        | 0.14         | 0.33        |
| miR-659-3p           | 40        | -0.22±0.25        | 0.38        | 0.77        | 34        | -0.37±0.25        | 0.14         | 0.33        |
| miR-218-5p           | 53        | -0.08±0.14        | 0.55        | 0.82        | 35        | -0.21±0.14        | 0.14         | 0.33        |
| miR-106b-5p          | 47        | -0.10±0.14        | 0.49        | 0.8         | 36        | 0.21±0.15         | 0.15         | 0.34        |
| miR-335-5p           | 70        | 0.04±0.22         | 0.85        | 0.95        | 37        | 0.31±0.22         | 0.17         | 0.36        |
| miR-208a-3p          | 19        | -0.20±0.15        | 0.16        | 0.67        | 38        | -0.20±0.15        | 0.18         | 0.37        |
| miR-208b-3p          | 13        | -0.35±0.22        | 0.11        | 0.64        | 39        | -0.30±0.23        | 0.19         | 0.39        |
| miR-363-3p           | 60        | -0.09±0.19        | 0.65        | 0.86        | 40        | -0.25±0.19        | 0.20         | 0.39        |
| miR-103a-3p          | 44        | -0.26±0.33        | 0.44        | 0.8         | 41        | -0.43±0.34        | 0.20         | 0.39        |
| miR-107              | 77        | -0.02±0.23        | 0.94        | 0.97        | 42        | -0.28±0.23        | 0.22         | 0.42        |



|                    |          |                   |             |             |    |            |      |      |
|--------------------|----------|-------------------|-------------|-------------|----|------------|------|------|
| miR-98-5p          | 52       | -0.31±0.51        | 0.54        | 0.82        | 43 | -0.59±0.50 | 0.25 | 0.44 |
| miR-15a-5p         | 74       | -0.03±0.22        | 0.88        | 0.95        | 44 | -0.27±0.23 | 0.25 | 0.44 |
| <b>miR-193b-3p</b> | <b>3</b> | <b>-0.77±0.36</b> | <b>0.03</b> | <b>0.56</b> | 45 | -0.44±0.37 | 0.25 | 0.44 |
| miR-122-5p         | 26       | -0.68±0.57        | 0.24        | 0.73        | 46 | -0.66±0.58 | 0.26 | 0.44 |
| miR-22-3p          | 54       | -0.12±0.21        | 0.56        | 0.82        | 47 | -0.23±0.20 | 0.26 | 0.44 |
| miR-133a-3p        | 63       | -0.11±0.32        | 0.74        | 0.92        | 48 | 0.35±0.33  | 0.29 | 0.48 |
| miR-20a-5p         | 65       | 0.04±0.12         | 0.75        | 0.92        | 49 | 0.12±0.12  | 0.32 | 0.51 |
| let-7d-5p          | 21       | -0.28±0.21        | 0.19        | 0.69        | 50 | -0.21±0.21 | 0.32 | 0.51 |
| miR-126-3p         | 43       | -0.07±0.09        | 0.43        | 0.8         | 51 | -0.09±0.09 | 0.33 | 0.51 |
| miR-29a-3p         | 48       | 0.12±0.17         | 0.49        | 0.8         | 52 | 0.15±0.17  | 0.38 | 0.57 |
| miR-378a-3p        | 34       | -0.18±0.18        | 0.32        | 0.75        | 53 | -0.17±0.19 | 0.38 | 0.57 |
| miR-28-3p          | 46       | -0.12±0.18        | 0.49        | 0.8         | 54 | -0.15±0.18 | 0.41 | 0.59 |
| miR-181a-5p        | 29       | -0.34±0.31        | 0.27        | 0.75        | 55 | -0.25±0.31 | 0.42 | 0.59 |
| miR-590-5p         | 32       | -0.14±0.14        | 0.31        | 0.75        | 56 | -0.11±0.14 | 0.43 | 0.59 |
| miR-145-5p         | 56       | 0.16±0.29         | 0.59        | 0.83        | 57 | 0.24±0.30  | 0.43 | 0.59 |
| miR-125a-5p        | 38       | 0.17±0.18         | 0.36        | 0.75        | 58 | 0.15±0.19  | 0.43 | 0.59 |
| let-7c-5p          | 66       | -0.08±0.26        | 0.77        | 0.93        | 59 | -0.21±0.27 | 0.44 | 0.60 |
| miR-150-5p         | 37       | -0.16±0.17        | 0.36        | 0.75        | 60 | -0.13±0.17 | 0.45 | 0.60 |
| miR-126-5p         | 41       | -0.16±0.19        | 0.40        | 0.78        | 61 | 0.14±0.20  | 0.48 | 0.62 |
| miR-383-5p         | 58       | 0.09±0.20         | 0.63        | 0.86        | 62 | -0.14±0.20 | 0.50 | 0.64 |
| miR-638            | 51       | -0.06±0.10        | 0.51        | 0.8         | 63 | -0.06±0.10 | 0.52 | 0.66 |
| miR-132-3p         | 76       | -0.05±0.57        | 0.93        | 0.97        | 64 | -0.38±0.59 | 0.53 | 0.66 |
| <b>miR-192-5p</b>  | <b>7</b> | <b>-0.35±0.18</b> | <b>0.06</b> | <b>0.56</b> | 65 | -0.12±0.19 | 0.54 | 0.66 |
| let-7b-5p          | 49       | 0.10±0.15         | 0.50        | 0.8         | 66 | 0.09±0.15  | 0.58 | 0.70 |
| miR-203a-3p        | 14       | 0.32±0.20         | 0.11        | 0.64        | 67 | -0.11±0.20 | 0.58 | 0.70 |
| miR-200a-3p        | 55       | 0.15±0.27         | 0.58        | 0.83        | 68 | -0.13±0.28 | 0.63 | 0.75 |
| miR-23b-3p         | 35       | 0.54±0.55         | 0.33        | 0.75        | 69 | 0.23±0.53  | 0.67 | 0.77 |
| miR-206            | 79       | -0.01±0.25        | 0.96        | 0.97        | 70 | -0.11±0.25 | 0.68 | 0.77 |
| miR-451a           | 80       | 0.01±0.23         | 0.97        | 0.97        | 71 | -0.09±0.22 | 0.68 | 0.77 |
| miR-155-5p         | 71       | 0.04±0.20         | 0.86        | 0.95        | 72 | -0.06±0.21 | 0.77 | 0.85 |
| miR-100-5p         | 68       | -0.14±0.58        | 0.81        | 0.95        | 73 | -0.17±0.58 | 0.78 | 0.85 |
| miR-15b-5p         | 78       | 0.02±0.31         | 0.95        | 0.97        | 74 | -0.07±0.32 | 0.82 | 0.88 |
| miR-375            | 28       | 0.39±0.35         | 0.27        | 0.75        | 75 | 0.04±0.36  | 0.91 | 0.97 |
| miR-224-5p         | 75       | 0.06±0.50         | 0.91        | 0.97        | 76 | 0.04±0.52  | 0.93 | 0.97 |
| <b>miR-34a-5p</b>  | <b>9</b> | <b>-0.30±0.17</b> | <b>0.08</b> | <b>0.64</b> | 77 | 0.01±0.17  | 0.93 | 0.97 |
| miR-181b-5p        | 64       | -0.07±0.20        | 0.74        | 0.92        | 78 | 0.01±0.21  | 0.94 | 0.97 |
| miR-26b-5p         | 31       | -0.18±0.17        | 0.30        | 0.75        | 79 | -0.01±0.17 | 0.97 | 0.98 |
| miR-125b-5p        | 50       | -0.17±0.26        | 0.51        | 0.8         | 80 | 0.00±0.27  | 0.99 | 0.99 |

Linear mixed effects model (hospital=random effect). A negative regression coefficient corresponds to a lower level of pre-treatment miRNA predictive of remission and vice versa. False discovery rate corrections for multiple testing (q-values) are based on the total number miRNAs analyzed per hypothesis (N=80). Feature-selected miRNAs (p<0.1) in bold. Abbreviations: hsa, homo sapiens; Regr. Coeff.,  $\beta$  regression coefficient; SE, standard error;

**Supplementary Table 4. Placebo group univariate analyses of association between pre-treatment micro-RNA and ACR/EULAR Boolean remission**

| miRNA                | 3m       |                   |             |             | 12m       |                   |             |             |
|----------------------|----------|-------------------|-------------|-------------|-----------|-------------------|-------------|-------------|
|                      | Rank     | Regr. Coeff. ± SE | p-value     | q-value     | Rank      | Regr. Coeff. ± SE | p-value     | q-value     |
| <b>miR-28-3p</b>     | 37       | 0.23±0.32         | 0.48        | 0.89        | <b>1</b>  | <b>0.7±0.3</b>    | <b>0.02</b> | <b>0.75</b> |
| <b>miR-106a-5p</b>   | 70       | -0.02±0.14        | 0.87        | 0.97        | <b>2</b>  | <b>-0.28±0.13</b> | <b>0.03</b> | <b>0.75</b> |
| <b>miR-19a-3p</b>    | 7        | <b>-0.55±0.27</b> | <b>0.05</b> | <b>0.55</b> | <b>3</b>  | <b>-0.53±0.25</b> | <b>0.04</b> | <b>0.75</b> |
| <b>miR-181b-5p</b>   | 59       | 0.08±0.24         | 0.73        | 0.97        | <b>4</b>  | <b>0.44±0.21</b>  | <b>0.04</b> | <b>0.75</b> |
| <b>miR-29c-3p</b>    | 78       | 0.00±0.26         | 0.99        | 1.00        | <b>5</b>  | <b>-0.49±0.24</b> | <b>0.05</b> | <b>0.75</b> |
| <b>miR-19b-3p</b>    | 2        | <b>-0.56±0.23</b> | <b>0.02</b> | <b>0.48</b> | <b>6</b>  | <b>-0.39±0.22</b> | <b>0.09</b> | <b>0.75</b> |
| <b>miR-590-5p</b>    | 26       | -0.15±0.15        | 0.32        | 0.89        | <b>7</b>  | <b>-0.24±0.14</b> | <b>0.09</b> | <b>0.75</b> |
| <b>let-7c-5p</b>     | 71       | 0.04±0.24         | 0.87        | 0.97        | <b>8</b>  | <b>-0.38±0.22</b> | <b>0.09</b> | <b>0.75</b> |
| <b>miR-20a-5p</b>    | 33       | -0.12±0.14        | 0.40        | 0.89        | <b>9</b>  | <b>-0.22±0.13</b> | <b>0.09</b> | <b>0.75</b> |
| <b>miR-145-5p</b>    | 29       | 0.32±0.35         | 0.37        | 0.89        | <b>10</b> | <b>-0.58±0.34</b> | <b>0.09</b> | <b>0.75</b> |
| miR-133a-3p          | 22       | -0.48±0.43        | 0.27        | 0.89        | 11        | -0.63±0.41        | 0.13        | 0.75        |
| <b>miR-126-5p</b>    | <b>5</b> | <b>-0.40±0.20</b> | <b>0.04</b> | <b>0.55</b> | 12        | -0.28±0.19        | 0.13        | 0.75        |
| miR-223-3p           | 18       | -0.19±0.15        | 0.20        | 0.89        | 13        | -0.21±0.15        | 0.16        | 0.75        |
| miR-378a-3p          | 48       | 0.15±0.26         | 0.56        | 0.89        | 14        | 0.34±0.24         | 0.16        | 0.75        |
| <b>miR-199a-b-3p</b> | <b>9</b> | <b>-0.54±0.30</b> | <b>0.08</b> | <b>0.68</b> | 15        | -0.41±0.29        | 0.17        | 0.75        |
| miR-17-5p            | 60       | -0.04±0.13        | 0.75        | 0.97        | 16        | -0.16±0.12        | 0.17        | 0.75        |
| miR-140-3p           | 16       | -0.44±0.33        | 0.18        | 0.87        | 17        | -0.43±0.31        | 0.17        | 0.75        |
| miR-7-5p             | 39       | -0.12±0.18        | 0.49        | 0.89        | 18        | 0.23±0.17         | 0.18        | 0.75        |
| miR-23a-3p           | 12       | -0.55±0.40        | 0.17        | 0.87        | 19        | -0.49±0.39        | 0.21        | 0.75        |
| miR-16-5p            | 30       | -0.14±0.16        | 0.38        | 0.89        | 20        | -0.2±0.16         | 0.21        | 0.75        |
| miR-125a-5p          | 25       | 0.28±0.28         | 0.32        | 0.89        | 21        | 0.34±0.27         | 0.22        | 0.75        |
| miR-218-5p           | 74       | -0.03±0.19        | 0.90        | 0.97        | 22        | 0.22±0.18         | 0.23        | 0.75        |
| miR-155-5p           | 79       | 0.00±0.29         | 0.99        | 1.00        | 23        | 0.33±0.27         | 0.23        | 0.75        |
| miR-579-3p           | 32       | -0.26±0.31        | 0.40        | 0.89        | 24        | 0.34±0.29         | 0.24        | 0.75        |
| miR-29b-3p           | 51       | 0.29±0.51         | 0.57        | 0.89        | 25        | -0.56±0.49        | 0.26        | 0.75        |
| miR-107              | 20       | 0.45±0.37         | 0.23        | 0.89        | 26        | 0.4±0.36          | 0.26        | 0.75        |
| miR-375              | 80       | 0.00±0.40         | 1.00        | 1.00        | 27        | -0.45±0.4         | 0.27        | 0.75        |
| <b>miR-24-3p</b>     | <b>8</b> | <b>-0.36±0.19</b> | <b>0.06</b> | <b>0.64</b> | 28        | -0.19±0.19        | 0.31        | 0.75        |
| miR-150-5p           | 72       | 0.04±0.24         | 0.88        | 0.97        | 29        | 0.22±0.22         | 0.33        | 0.75        |
| miR-224-5p           | 63       | 0.14±0.64         | 0.82        | 0.97        | 30        | -0.6±0.62         | 0.34        | 0.75        |
| miR-208a-3p          | 56       | 0.09±0.22         | 0.67        | 0.95        | 31        | 0.19±0.21         | 0.35        | 0.75        |
| miR-15b-5p           | 44       | -0.21±0.32        | 0.52        | 0.89        | 32        | -0.3±0.31         | 0.35        | 0.75        |
| miR-34a-5p           | 65       | -0.05±0.22        | 0.83        | 0.97        | 33        | 0.19±0.21         | 0.35        | 0.75        |
| miR-100-5p           | 19       | -0.78±0.63        | 0.22        | 0.89        | 34        | 0.56±0.6          | 0.36        | 0.75        |
| miR-184              | 76       | 0.01±0.17         | 0.95        | 0.99        | 35        | -0.16±0.17        | 0.36        | 0.75        |
| miR-208b-3p          | 11       | 0.44±0.30         | 0.14        | 0.87        | 36        | -0.26±0.29        | 0.37        | 0.75        |
| miR-363-3p           | 42       | 0.23±0.36         | 0.52        | 0.89        | 37        | 0.31±0.35         | 0.37        | 0.75        |
| miR-26a-5p           | 17       | 0.18±0.14         | 0.19        | 0.87        | 38        | -0.11±0.13        | 0.39        | 0.75        |
| miR-106b-5p          | 62       | -0.06±0.20        | 0.76        | 0.97        | 39        | -0.16±0.19        | 0.40        | 0.75        |
| miR-122-5p           | 64       | 0.13±0.58         | 0.83        | 0.97        | 40        | -0.45±0.57        | 0.42        | 0.75        |
| <b>miR-128-3p</b>    | <b>1</b> | <b>-0.93±0.35</b> | <b>0.01</b> | <b>0.48</b> | 41        | -0.27±0.34        | 0.43        | 0.75        |
| miR-200a-3p          | 46       | 0.17±0.29         | 0.55        | 0.89        | 42        | -0.22±0.27        | 0.43        | 0.75        |

|                    |           |                   |             |             |    |            |      |      |
|--------------------|-----------|-------------------|-------------|-------------|----|------------|------|------|
| miR-101-3p         | 21        | 0.39±0.33         | 0.25        | 0.89        | 43 | -0.25±0.32 | 0.44 | 0.75 |
| miR-423-5p         | 52        | -0.10±0.18        | 0.58        | 0.89        | 44 | -0.14±0.18 | 0.44 | 0.75 |
| miR-451a           | 61        | 0.08±0.27         | 0.75        | 0.97        | 45 | 0.2±0.26   | 0.45 | 0.75 |
| miR-192-5p         | 77        | 0.01±0.23         | 0.95        | 0.99        | 46 | 0.16±0.22  | 0.46 | 0.75 |
| miR-126-3p         | 66        | -0.02±0.10        | 0.84        | 0.97        | 47 | -0.08±0.1  | 0.46 | 0.75 |
| miR-10b-5p         | 58        | -0.23±0.67        | 0.73        | 0.97        | 48 | -0.47±0.64 | 0.46 | 0.75 |
| <b>miR-27b-3p</b>  | <b>3</b>  | <b>-0.66±0.28</b> | <b>0.02</b> | <b>0.48</b> | 49 | -0.19±0.26 | 0.48 | 0.75 |
| miR-193b-3p        | 67        | 0.09±0.48         | 0.85        | 0.97        | 50 | -0.33±0.47 | 0.49 | 0.75 |
| miR-23b-3p         | 53        | 0.34±0.66         | 0.60        | 0.90        | 51 | 0.39±0.57  | 0.50 | 0.75 |
| miR-125b-5p        | 28        | 0.47±0.52         | 0.37        | 0.89        | 52 | 0.34±0.5   | 0.50 | 0.75 |
| let-7b-5p          | 35        | 0.13±0.17         | 0.46        | 0.89        | 53 | -0.11±0.17 | 0.51 | 0.75 |
| let-7i-5p          | 41        | 0.10±0.15         | 0.51        | 0.89        | 54 | -0.1±0.15  | 0.52 | 0.75 |
| <b>miR-203a-3p</b> | <b>6</b>  | <b>-0.41±0.20</b> | <b>0.05</b> | <b>0.55</b> | 55 | -0.12±0.18 | 0.52 | 0.75 |
| miR-29a-3p         | 68        | 0.04±0.25         | 0.87        | 0.97        | 56 | 0.15±0.24  | 0.53 | 0.75 |
| miR-206            | 15        | 0.45±0.33         | 0.18        | 0.87        | 57 | -0.2±0.32  | 0.53 | 0.75 |
| <b>miR-10a-5p</b>  | <b>4</b>  | <b>-0.98±0.43</b> | <b>0.02</b> | <b>0.48</b> | 58 | 0.25±0.43  | 0.56 | 0.77 |
| miR-92a-3p         | 47        | -0.07±0.11        | 0.55        | 0.89        | 59 | 0.06±0.1   | 0.58 | 0.79 |
| miR-146b-5p        | 57        | -0.05±0.13        | 0.71        | 0.97        | 60 | 0.07±0.13  | 0.60 | 0.8  |
| miR-342-3p         | 43        | 0.14±0.22         | 0.52        | 0.89        | 61 | 0.11±0.22  | 0.62 | 0.81 |
| miR-132-3p         | 69        | -0.13±0.80        | 0.87        | 0.97        | 62 | -0.35±0.74 | 0.63 | 0.81 |
| miR-659-3p         | 27        | 0.38±0.42         | 0.37        | 0.89        | 63 | 0.19±0.41  | 0.64 | 0.81 |
| <b>miR-26b-5p</b>  | <b>10</b> | <b>0.38±0.22</b>  | <b>0.09</b> | <b>0.70</b> | 64 | 0.1±0.22   | 0.65 | 0.82 |
| miR-383-5p         | 13        | 0.32±0.23         | 0.17        | 0.87        | 65 | 0.08±0.21  | 0.71 | 0.87 |
| miR-146a-5p        | 55        | -0.08±0.17        | 0.63        | 0.91        | 66 | 0.06±0.16  | 0.72 | 0.87 |
| miR-18a-5p         | 38        | -0.34±0.49        | 0.49        | 0.89        | 67 | -0.17±0.47 | 0.73 | 0.87 |
| miR-21-5p          | 31        | -0.12±0.14        | 0.38        | 0.89        | 68 | 0.04±0.13  | 0.75 | 0.88 |
| let-7a-5p          | 75        | 0.05±0.44         | 0.91        | 0.97        | 69 | 0.11±0.43  | 0.79 | 0.92 |
| miR-27a-3p         | 23        | -0.22±0.20        | 0.27        | 0.89        | 70 | -0.05±0.19 | 0.81 | 0.92 |
| miR-335-5p         | 73        | 0.05±0.36         | 0.89        | 0.97        | 71 | -0.08±0.35 | 0.82 | 0.92 |
| miR-98-5p          | 50        | 0.29±0.50         | 0.57        | 0.89        | 72 | 0.09±0.49  | 0.85 | 0.93 |
| miR-221-3p         | 36        | -0.18±0.24        | 0.47        | 0.89        | 73 | -0.04±0.23 | 0.86 | 0.93 |
| miR-15a-5p         | 45        | 0.16±0.26         | 0.55        | 0.89        | 74 | -0.04±0.25 | 0.86 | 0.93 |
| miR-638            | 49        | -0.05±0.09        | 0.57        | 0.89        | 75 | 0.01±0.09  | 0.90 | 0.95 |
| miR-181a-5p        | 24        | -0.38±0.35        | 0.28        | 0.89        | 76 | 0.04±0.35  | 0.91 | 0.95 |
| miR-103a-3p        | 54        | -0.21±0.41        | 0.61        | 0.90        | 77 | 0.04±0.39  | 0.92 | 0.95 |
| miR-22-3p          | 34        | -0.22±0.27        | 0.41        | 0.89        | 78 | -0.02±0.26 | 0.93 | 0.95 |
| miR-142-3p         | 14        | 0.20±0.15         | 0.17        | 0.87        | 79 | -0.01±0.14 | 0.96 | 0.97 |
| let-7d-5p          | 40        | 0.19±0.28         | 0.51        | 0.89        | 80 | 0.01±0.27  | 0.98 | 0.97 |

Linear mixed effects model (hospital=random effect). A negative regression coefficient corresponds to a lower level of pre-treatment miRNA predictive of remission and vice versa. False discovery rate corrections for multiple testing (q-values) are based on the total number miRNAs analyzed per hypothesis (N=80). Feature-selected miRNAs (p<0.1) in bold. Abbreviations: hsa, homo sapiens; Regr. Coeff.,  $\beta$  regression coefficient; SE, standard error;

**Supplementary Table 5. Univariate analyses of association between 3-month micro-RNA and 12-month ACR/EULAR Boolean remission**

| hsa-miRNA   | <u>Adalimumab</u><br><u>group</u> |                      |         |         | <u>Placebo</u><br><u>group</u> |                   |         |         |
|-------------|-----------------------------------|----------------------|---------|---------|--------------------------------|-------------------|---------|---------|
|             | Rank                              | Regr. Coeff.<br>± SE | p-value | q-value | miRNA                          | Regr. Coeff. ± SE | p-value | q-value |
| miR-98-5p   | 1                                 | -0.38±0.15           | 0.02    | 0.88    | miR_208a_3p                    | 0.34±0.17         | 0.05    | 0.95    |
| miR-125b-5p | 2                                 | 1.16±0.52            | 0.03    | 0.88    | miR_98_5p                      | 0.28±0.16         | 0.09    | 0.95    |
| miR-184     | 3                                 | -0.28±0.13           | 0.03    | 0.88    | miR_106b_5p                    | -0.45±0.26        | 0.09    | 0.95    |
| miR-106b-5p | 4                                 | 0.51±0.27            | 0.06    | 0.89    | miR_23a_3p                     | 0.32±0.19         | 0.11    | 0.95    |
| miR-29b-3p  | 5                                 | 1.33±0.7             | 0.06    | 0.89    | miR_150_5p                     | -0.36±0.22        | 0.11    | 0.95    |
| miR-181b-5p | 6                                 | -0.23±0.13           | 0.08    | 0.89    | let_7a_5p                      | -0.49±0.31        | 0.12    | 0.95    |
| miR-122-5p  | 7                                 | -0.43±0.25           | 0.09    | 0.89    | miR_140_3p                     | 0.56±0.39         | 0.15    | 0.95    |
| let-7a-5p   | 8                                 | -0.54±0.31           | 0.09    | 0.89    | miR_26a_5p                     | -0.20±0.15        | 0.19    | 0.95    |
| miR-224-5p  | 9                                 | 0.44±0.27            | 0.11    | 0.89    | miR_192_5p                     | 0.27±0.20         | 0.19    | 0.95    |
| miR-132-3p  | 10                                | -0.78±0.49           | 0.11    | 0.89    | miR_103a_3p                    | 0.22±0.17         | 0.20    | 0.95    |
| miR-181a-5p | 11                                | -0.43±0.27           | 0.12    | 0.89    | miR_579_3p                     | 0.55±0.43         | 0.20    | 0.95    |
| let-7c-5p   | 12                                | 0.21±0.17            | 0.21    | 0.99    | miR_184                        | -0.20±0.16        | 0.24    | 0.95    |
| miR-19b-3p  | 13                                | -0.17±0.14           | 0.23    | 0.99    | miR_34a_5p                     | 0.12±0.10         | 0.24    | 0.95    |
| miR-20a-5p  | 14                                | -0.27±0.22           | 0.24    | 0.99    | miR_142_3p                     | -0.16±0.13        | 0.24    | 0.95    |
| miR-659-3p  | 15                                | 0.63±0.56            | 0.26    | 0.99    | miR_638                        | 0.49±0.43         | 0.25    | 0.95    |
| miR-378a-3p | 16                                | -0.32±0.29           | 0.26    | 0.99    | miR_132_3p                     | -0.70±0.62        | 0.26    | 0.95    |
| miR-23a-3p  | 17                                | -0.27±0.25           | 0.27    | 0.99    | miR_218_5p                     | 0.30±0.26         | 0.26    | 0.95    |
| miR-133a-3p | 18                                | -0.31±0.29           | 0.28    | 0.99    | miR_23b_3p                     | -0.21±0.18        | 0.27    | 0.95    |
| miR-140-3p  | 19                                | 0.44±0.41            | 0.29    | 0.99    | miR_126_3p                     | -0.44±0.40        | 0.27    | 0.95    |
| miR-10a-5p  | 20                                | -0.16±0.17           | 0.37    | 0.99    | miR_208b_3p                    | 0.24±0.22         | 0.27    | 0.95    |
| miR-34a-5p  | 21                                | -0.1±0.12            | 0.39    | 0.99    | miR_28_3p                      | 0.22±0.20         | 0.28    | 0.95    |
| let-7i-5p   | 22                                | 0.11±0.13            | 0.41    | 0.99    | miR_22_3p                      | 0.24±0.22         | 0.28    | 0.95    |
| miR-126-5p  | 23                                | -0.29±0.36           | 0.42    | 0.99    | miR_125b_5p                    | -0.55±0.54        | 0.31    | 0.95    |
| let-7d-5p   | 24                                | 0.13±0.16            | 0.43    | 0.99    | miR_20a_5p                     | 0.17±0.17         | 0.32    | 0.95    |
| miR-223-3p  | 25                                | 0.2±0.25             | 0.44    | 0.99    | miR_100_5p                     | 0.41±0.41         | 0.32    | 0.95    |
| miR-145-5p  | 26                                | -0.1±0.13            | 0.45    | 0.99    | miR_342_3p                     | -0.45±0.47        | 0.34    | 0.95    |
| miR-221-3p  | 27                                | 0.28±0.37            | 0.45    | 0.99    | miR_16_5p                      | 0.09±0.10         | 0.35    | 0.95    |
| miR-146a-5p | 28                                | 0.18±0.24            | 0.45    | 0.99    | miR_101_3p                     | 0.18±0.19         | 0.35    | 0.95    |
| miR-18a-5p  | 29                                | -0.07±0.09           | 0.46    | 0.99    | miR_125a_5p                    | -0.35±0.38        | 0.36    | 0.95    |
| miR-22-3p   | 30                                | 0.2±0.28             | 0.47    | 0.99    | miR_10a_5p                     | 0.12±0.13         | 0.37    | 0.95    |
| miR-92a-3p  | 31                                | -0.32±0.44           | 0.47    | 0.99    | miR_155_5p                     | -0.14±0.16        | 0.39    | 0.95    |
| miR-200a-3p | 32                                | -0.19±0.26           | 0.47    | 0.99    | miR_146a_5p                    | 0.23±0.27         | 0.41    | 0.95    |
| miR-7-5p    | 33                                | -0.36±0.5            | 0.48    | 0.99    | miR_193b_3p                    | -0.13±0.18        | 0.46    | 0.95    |
| miR-579-3p  | 34                                | -0.26±0.37           | 0.48    | 0.99    | miR_17_5p                      | -0.09±0.12        | 0.47    | 0.95    |
| miR-142-3p  | 35                                | 0.12±0.17            | 0.49    | 0.99    | miR_27a_3p                     | 0.15±0.21         | 0.48    | 0.95    |
| miR-192-5p  | 36                                | 0.17±0.27            | 0.54    | 0.99    | miR_223_3p                     | 0.14±0.21         | 0.49    | 0.95    |
| miR-590-5p  | 37                                | 0.18±0.3             | 0.55    | 0.99    | miR_145_5p                     | 0.09±0.14         | 0.50    | 0.95    |
| miR-29a-3p  | 38                                | 0.17±0.28            | 0.55    | 0.99    | miR_92a_3p                     | -0.25±0.37        | 0.51    | 0.95    |
| miR-27b-3p  | 39                                | 0.13±0.21            | 0.56    | 0.99    | miR_423_5p                     | -0.18±0.29        | 0.54    | 0.95    |
| miR-17-5p   | 40                                | 0.1±0.19             | 0.59    | 0.99    | miR_590_5p                     | -0.18±0.31        | 0.56    | 0.95    |
| miR-208b-3p | 41                                | -0.11±0.21           | 0.61    | 0.99    | miR_181b_5p                    | -0.08±0.13        | 0.56    | 0.95    |
| miR-342-3p  | 42                                | 0.2±0.38             | 0.61    | 0.99    | miR_15a_5p                     | 0.09±0.16         | 0.57    | 0.95    |

|              |    |            |      |      |             |            |      |      |
|--------------|----|------------|------|------|-------------|------------|------|------|
| miR-101-3p   | 43 | -0.12±0.23 | 0.61 | 0.99 | miR_335_5p  | -0.14±0.25 | 0.57 | 0.95 |
| miR-126-3p   | 44 | 0.2±0.4    | 0.62 | 0.99 | miR_106a_5p | -0.26±0.46 | 0.57 | 0.95 |
| miR-100-5p   | 45 | -0.21±0.42 | 0.62 | 0.99 | miR_29b_3p  | -0.41±0.72 | 0.57 | 0.95 |
| miR-638      | 46 | 0.29±0.58  | 0.62 | 0.99 | let_7d_5p   | -0.06±0.11 | 0.60 | 0.95 |
| miR-451a     | 47 | -0.14±0.29 | 0.63 | 0.99 | miR_24_3p   | 0.10±0.20  | 0.61 | 0.95 |
| let-7b-5p    | 48 | -0.16±0.34 | 0.65 | 0.99 | let_7b_5p   | 0.13±0.27  | 0.63 | 0.95 |
| miR-19a-3p   | 49 | -0.1±0.24  | 0.68 | 0.99 | miR_206     | -0.16±0.32 | 0.63 | 0.95 |
| miR-218-5p   | 50 | -0.16±0.4  | 0.69 | 0.99 | miR_378a_3p | -0.17±0.35 | 0.63 | 0.95 |
| miR-203a-3p  | 51 | 0.14±0.35  | 0.69 | 0.99 | miR_122_5p  | 0.12±0.26  | 0.63 | 0.95 |
| miR-363-3p   | 52 | -0.21±0.54 | 0.70 | 0.99 | miR_21_5p   | 0.09±0.19  | 0.65 | 0.95 |
| miR-103a-3p  | 53 | -0.07±0.19 | 0.70 | 0.99 | let_7i_5p   | -0.05±0.12 | 0.66 | 0.95 |
| miR-146b-5p  | 54 | -0.16±0.41 | 0.71 | 0.99 | miR_27b_3p  | -0.07±0.17 | 0.67 | 0.95 |
| miR-23b-3p   | 55 | 0.07±0.19  | 0.72 | 0.99 | miR_133a_3p | -0.17±0.41 | 0.68 | 0.95 |
| miR-26b-5p   | 56 | 0.08±0.23  | 0.73 | 0.99 | miR_19b_3p  | -0.06±0.16 | 0.69 | 0.95 |
| miR-193b-3p  | 57 | 0.07±0.21  | 0.73 | 0.99 | miR_18a_5p  | -0.03±0.09 | 0.70 | 0.95 |
| miR-106a-5p  | 58 | -0.13±0.39 | 0.75 | 0.99 | miR_146b_5p | -0.10±0.28 | 0.71 | 0.95 |
| miR-128-3p   | 59 | 0.11±0.37  | 0.77 | 0.99 | miR_363_3p  | 0.17±0.46  | 0.72 | 0.95 |
| miR-28-3p    | 60 | -0.16±0.56 | 0.77 | 0.99 | miR_128_3p  | 0.15±0.42  | 0.72 | 0.95 |
| miR-206      | 61 | -0.07±0.27 | 0.81 | 0.99 | miR_383_5p  | -0.12±0.33 | 0.72 | 0.95 |
| miR-155-5p   | 62 | 0.04±0.19  | 0.83 | 0.99 | miR_221_3p  | 0.06±0.25  | 0.80 | 0.97 |
| miR-16-5p    | 63 | 0.02±0.12  | 0.84 | 0.99 | let_7c_5p   | -0.04±0.16 | 0.81 | 0.97 |
| miR-150-5p   | 64 | 0.07±0.32  | 0.84 | 0.99 | miR_224_5p  | -0.05±0.21 | 0.82 | 0.97 |
| miR-15b-5p   | 65 | -0.05±0.24 | 0.84 | 0.99 | miR_26b_5p  | -0.05±0.22 | 0.84 | 0.97 |
| miR-24-3p    | 66 | 0.06±0.28  | 0.84 | 0.99 | miR_199a_b_ | -0.05±0.24 | 0.84 | 0.97 |
| miR-29c-3p   | 67 | -0.03±0.14 | 0.84 | 0.99 | miR_15b_5p  | -0.03±0.17 | 0.84 | 0.97 |
| miR-26a-5p   | 68 | 0.04±0.22  | 0.85 | 0.99 | miR_29c_3p  | 0.03±0.13  | 0.84 | 0.97 |
| miR-199ab-3p | 69 | -0.03±0.24 | 0.89 | 0.99 | miR_375     | 0.07±0.36  | 0.85 | 0.97 |
| miR-335-5p   | 70 | 0.05±0.37  | 0.90 | 0.99 | miR_181a_5p | -0.05±0.27 | 0.85 | 0.97 |
| miR-423-5p   | 71 | -0.04±0.31 | 0.91 | 0.99 | miR_203a_3p | -0.04±0.27 | 0.88 | 0.98 |
| miR-10b-5p   | 72 | -0.02±0.23 | 0.95 | 0.99 | miR_7_5p    | 0.06±0.46  | 0.89 | 0.98 |
| miR-383-5p   | 73 | -0.03±0.39 | 0.95 | 0.99 | miR_107     | -0.07±0.67 | 0.92 | 0.98 |
| miR-375      | 74 | -0.02±0.34 | 0.95 | 0.99 | miR_10b_5p  | -0.01±0.16 | 0.93 | 0.98 |
| miR-15a-5p   | 75 | -0.01±0.23 | 0.96 | 0.99 | miR_451a    | 0.02±0.23  | 0.93 | 0.98 |
| miR-21-5p    | 76 | 0.01±0.27  | 0.96 | 0.99 | miR_19a_3p  | 0.01±0.17  | 0.94 | 0.98 |
| miR-27a-3p   | 77 | -0.01±0.34 | 0.97 | 0.99 | miR_29a_3p  | -0.02±0.22 | 0.95 | 0.98 |
| miR-125a-5p  | 78 | 0.01±0.4   | 0.97 | 0.99 | miR_200a_3p | 0.01±0.28  | 0.97 | 1.00 |
| miR-107      | 79 | -0.01±0.58 | 0.98 | 0.99 | miR_659_3p  | 0.00±0.50  | 1.00 | 1.00 |
| miR-208a-3p  | 80 | 0±0.22     | 0.99 | 0.99 | miR_126_5p  | 0.00±0.37  | 1.00 | 1.00 |

**Supplementary Table 6. Univariate analyses of association between 3-month change in micro-RNA and 12-month ACR/EULAR Boolean remission**

| hsa-miRNA          | Adalimumab group |                   |               |             | Placebo group |                   |             |             |
|--------------------|------------------|-------------------|---------------|-------------|---------------|-------------------|-------------|-------------|
|                    | Rank             | Regr. Coeff. ± SE | p-value       | q-value     | Rank          | Regr. Coeff. ± SE | p-value     | q-value     |
| <b>miR-27a-3p</b>  | <b>1</b>         | <b>-0.56±0.14</b> | <b>0.0002</b> | <b>0.02</b> | 39            | 0.13±0.18         | 0.46        | 0.95        |
| <b>miR-423-5p</b>  | <b>2</b>         | <b>-0.51±0.19</b> | <b>0.01</b>   | <b>0.31</b> | <b>4</b>      | <b>0.35±0.19</b>  | <b>0.07</b> | <b>0.94</b> |
| <b>miR-146a-5p</b> | <b>3</b>         | <b>-0.43±0.17</b> | <b>0.01</b>   | <b>0.31</b> | 77            | 0.01±0.19         | 0.95        | 0.96        |
| <b>miR-10a-5p</b>  | <b>4</b>         | <b>1.25±0.52</b>  | <b>0.02</b>   | <b>0.31</b> | 43            | -0.3±0.47         | 0.52        | 0.96        |
| <b>miR-29b-3p</b>  | <b>5</b>         | <b>1.23±0.52</b>  | <b>0.02</b>   | <b>0.31</b> | 64            | 0.12±0.49         | 0.8         | 0.96        |
| <b>miR-21-5p</b>   | <b>6</b>         | <b>-0.29±0.13</b> | <b>0.03</b>   | <b>0.36</b> | 33            | 0.09±0.11         | 0.43        | 0.94        |
| <b>miR-122-5p</b>  | <b>7</b>         | <b>1.46±0.67</b>  | <b>0.03</b>   | <b>0.36</b> | 59            | 0.2±0.66          | 0.76        | 0.96        |
| <b>miR-579-3p</b>  | <b>8</b>         | <b>-0.82±0.39</b> | <b>0.04</b>   | <b>0.39</b> | 21            | -0.36±0.34        | 0.3         | 0.94        |
| <b>miR-27b-3p</b>  | <b>9</b>         | <b>-0.55±0.27</b> | <b>0.05</b>   | <b>0.41</b> | 67            | 0.07±0.35         | 0.84        | 0.96        |
| <b>miR-24-3p</b>   | <b>10</b>        | <b>-0.29±0.15</b> | <b>0.06</b>   | <b>0.42</b> | 34            | 0.13±0.17         | 0.43        | 0.94        |
| <b>miR-23a-3p</b>  | <b>11</b>        | <b>-0.81±0.43</b> | <b>0.07</b>   | <b>0.42</b> | 10            | 0.63±0.46         | 0.17        | 0.94        |
| <b>miR-19a-3p</b>  | <b>12</b>        | <b>-0.42±0.23</b> | <b>0.07</b>   | <b>0.42</b> | 19            | 0.29±0.26         | 0.26        | 0.94        |
| <b>miR-145-5p</b>  | <b>13</b>        | <b>-0.58±0.32</b> | <b>0.08</b>   | <b>0.42</b> | 24            | 0.37±0.38         | 0.34        | 0.94        |
| <b>miR-29c-3p</b>  | <b>14</b>        | <b>0.6±0.34</b>   | <b>0.08</b>   | <b>0.42</b> | 68            | 0.05±0.28         | 0.86        | 0.96        |
| <b>miR-363-3p</b>  | <b>15</b>        | <b>0.51±0.29</b>  | <b>0.08</b>   | <b>0.42</b> | 28            | -0.34±0.37        | 0.36        | 0.94        |
| <b>miR-10b-5p</b>  | <b>16</b>        | <b>1.31±0.77</b>  | <b>0.09</b>   | <b>0.42</b> | 9             | 1.09±0.76         | 0.16        | 0.94        |
| <b>let-7c-5p</b>   | <b>17</b>        | <b>-0.55±0.32</b> | <b>0.1</b>    | <b>0.42</b> | 70            | -0.05±0.29        | 0.87        | 0.96        |
| miR-140-3p         | 18               | -0.51±0.31        | 0.1           | 0.42        | 25            | 0.26±0.28         | 0.35        | 0.94        |
| <b>miR-19b-3p</b>  | <b>19</b>        | <b>-0.26±0.16</b> | <b>0.1</b>    | <b>0.42</b> | <b>6</b>      | <b>0.31±0.18</b>  | <b>0.09</b> | <b>0.94</b> |
| miR-18a-5p         | 20               | -0.82±0.51        | 0.11          | 0.42        | 18            | 0.7±0.6           | 0.25        | 0.94        |
| miR-7-5p           | 21               | 0.39±0.24         | 0.11          | 0.42        | 63            | -0.08±0.31        | 0.8         | 0.96        |
| miR-221-3p         | 22               | -0.36±0.25        | 0.15          | 0.52        | 56            | 0.09±0.25         | 0.73        | 0.96        |
| miR-107            | 23               | 0.33±0.23         | 0.15          | 0.52        | 17            | -0.45±0.38        | 0.24        | 0.94        |
| miR-28-3p          | 24               | 0.28±0.2          | 0.16          | 0.52        | 11            | -0.4±0.3          | 0.19        | 0.94        |
| miR-184            | 25               | 0.28±0.21         | 0.19          | 0.57        | 55            | -0.07±0.19        | 0.7         | 0.96        |
| miR-126-5p         | 26               | -0.23±0.18        | 0.19          | 0.57        | 15            | 0.23±0.18         | 0.2         | 0.94        |
| <b>miR-26b-5p</b>  | <b>27</b>        | <b>-0.25±0.2</b>  | <b>0.21</b>   | <b>0.6</b>  | <b>2</b>      | <b>-0.39±0.21</b> | <b>0.06</b> | <b>0.94</b> |
| <b>miR-133a-3p</b> | <b>28</b>        | <b>-0.42±0.34</b> | <b>0.22</b>   | <b>0.6</b>  | <b>1</b>      | <b>0.92±0.44</b>  | <b>0.04</b> | <b>0.94</b> |
| miR-199a-b-3p      | 29               | -0.27±0.23        | 0.23          | 0.6         | 40            | 0.24±0.34         | 0.47        | 0.95        |
| miR-378a-3p        | 30               | 0.26±0.22         | 0.23          | 0.6         | 27            | -0.26±0.28        | 0.35        | 0.94        |
| miR-335-5p         | 31               | -0.37±0.3         | 0.23          | 0.6         | 16            | 0.41±0.33         | 0.22        | 0.94        |
| miR-451a           | 32               | 0.28±0.24         | 0.24          | 0.6         | 26            | -0.24±0.25        | 0.35        | 0.94        |
| miR-125a-5p        | 33               | -0.34±0.3         | 0.26          | 0.6         | 13            | -0.37±0.29        | 0.2         | 0.94        |
| miR-223-3p         | 34               | -0.14±0.12        | 0.26          | 0.6         | 73            | 0.02±0.16         | 0.92        | 0.96        |
| miR-16-5p          | 35               | -0.18±0.16        | 0.28          | 0.6         | 35            | 0.12±0.15         | 0.43        | 0.94        |
| miR-146b-5p        | 36               | -0.14±0.13        | 0.28          | 0.6         | 20            | 0.19±0.18         | 0.29        | 0.94        |
| miR-383-5p         | 37               | 0.22±0.2          | 0.28          | 0.6         | 38            | -0.18±0.24        | 0.45        | 0.94        |
| let-7d-5p          | 38               | -0.37±0.35        | 0.29          | 0.6         | 71            | -0.05±0.36        | 0.88        | 0.96        |
| miR-208b-3p        | 39               | 0.28±0.26         | 0.3           | 0.6         | 29            | 0.29±0.32         | 0.37        | 0.94        |
| miR-142-3p         | 40               | 0.16±0.15         | 0.3           | 0.6         | 45            | -0.09±0.16        | 0.57        | 0.96        |
| miR-181b-5p        | 41               | -0.23±0.23        | 0.31          | 0.6         | 62            | -0.07±0.24        | 0.78        | 0.96        |
| <b>miR-659-3p</b>  | <b>42</b>        | <b>0.31±0.31</b>  | <b>0.32</b>   | <b>0.6</b>  | <b>5</b>      | <b>-0.72±0.41</b> | <b>0.08</b> | <b>0.94</b> |

|                   |    |            |      |      |          |                  |             |             |
|-------------------|----|------------|------|------|----------|------------------|-------------|-------------|
| miR-342-3p        | 43 | 0.22±0.22  | 0.33 | 0.61 | 57       | -0.08±0.23       | 0.73        | 0.96        |
| miR-128-3p        | 44 | -0.26±0.27 | 0.34 | 0.61 | 51       | 0.17±0.39        | 0.67        | 0.96        |
| miR-100-5p        | 45 | 0.61±0.7   | 0.39 | 0.68 | 65       | -0.17±0.77       | 0.82        | 0.96        |
| miR-106a-5p       | 46 | -0.11±0.13 | 0.4  | 0.68 | 12       | 0.16±0.13        | 0.2         | 0.94        |
| miR-125b-5p       | 47 | 0.18±0.22  | 0.4  | 0.68 | 44       | 0.36±0.61        | 0.56        | 0.96        |
| miR-92a-3p        | 48 | -0.09±0.11 | 0.41 | 0.68 | 60       | -0.03±0.11       | 0.77        | 0.96        |
| miR-29a-3p        | 49 | -0.2±0.24  | 0.41 | 0.68 | 58       | 0.09±0.25        | 0.73        | 0.96        |
| miR-17-5p         | 50 | -0.1±0.13  | 0.42 | 0.68 | 41       | 0.08±0.12        | 0.52        | 0.96        |
| let-7a-5p         | 51 | 0.34±0.47  | 0.47 | 0.73 | 74       | 0.05±0.56        | 0.93        | 0.96        |
| miR-98-5p         | 52 | 0.41±0.57  | 0.47 | 0.73 | 54       | 0.24±0.59        | 0.68        | 0.96        |
| miR-206           | 53 | 0.2±0.28   | 0.48 | 0.73 | 32       | 0.24±0.3         | 0.42        | 0.94        |
| miR-155-5p        | 54 | 0.16±0.26  | 0.54 | 0.78 | 22       | -0.27±0.27       | 0.32        | 0.94        |
| miR-208a-3p       | 55 | 0.12±0.2   | 0.54 | 0.78 | 48       | 0.12±0.24        | 0.61        | 0.96        |
| miR-375           | 56 | 0.23±0.39  | 0.55 | 0.78 | 46       | -0.24±0.44       | 0.58        | 0.96        |
| let-7i-5p         | 57 | 0.08±0.14  | 0.56 | 0.78 | 42       | 0.12±0.18        | 0.52        | 0.96        |
| miR-22-3p         | 58 | -0.16±0.32 | 0.61 | 0.83 | 66       | -0.07±0.32       | 0.84        | 0.96        |
| miR-103a-3p       | 59 | 0.18±0.37  | 0.62 | 0.83 | 79       | -0.03±0.51       | 0.96        | 0.96        |
| <b>miR-34a-5p</b> | 60 | -0.1±0.2   | 0.63 | 0.83 | <b>3</b> | <b>-0.4±0.22</b> | <b>0.07</b> | <b>0.94</b> |
| miR-23b-3p        | 61 | 0.32±0.68  | 0.64 | 0.83 | 23       | 0.71±0.73        | 0.33        | 0.94        |
| miR-193b-3p       | 62 | 0.19±0.41  | 0.65 | 0.83 | 76       | 0.04±0.56        | 0.94        | 0.96        |
| miR-106b-5p       | 63 | -0.07±0.17 | 0.7  | 0.89 | 53       | 0.1±0.23         | 0.67        | 0.96        |
| miR-638           | 64 | -0.04±0.12 | 0.72 | 0.89 | 30       | 0.1±0.12         | 0.38        | 0.94        |
| miR-101-3p        | 65 | 0.12±0.35  | 0.73 | 0.89 | 61       | 0.14±0.48        | 0.78        | 0.96        |
| miR-132-3p        | 66 | 0.25±0.72  | 0.73 | 0.89 | 72       | 0.13±0.94        | 0.89        | 0.96        |
| miR-224-5p        | 67 | -0.13±0.47 | 0.78 | 0.93 | 47       | 0.3±0.57         | 0.6         | 0.96        |
| miR-218-5p        | 68 | 0.04±0.18  | 0.82 | 0.94 | 78       | -0.01±0.25       | 0.95        | 0.96        |
| miR-203a-3p       | 69 | 0.05±0.22  | 0.83 | 0.94 | 52       | -0.08±0.18       | 0.67        | 0.96        |
| miR-15b-5p        | 70 | -0.09±0.4  | 0.83 | 0.94 | 37       | 0.27±0.35        | 0.45        | 0.94        |
| miR-15a-5p        | 71 | 0.04±0.21  | 0.84 | 0.94 | 69       | 0.05±0.31        | 0.86        | 0.96        |
| miR-192-5p        | 72 | 0.04±0.21  | 0.85 | 0.94 | 36       | -0.2±0.25        | 0.43        | 0.94        |
| miR-26a-5p        | 73 | -0.03±0.14 | 0.86 | 0.94 | 80       | -0.01±0.17       | 0.96        | 0.96        |
| miR-200a-3p       | 74 | -0.06±0.36 | 0.87 | 0.94 | 7        | 0.74±0.46        | 0.11        | 0.94        |
| miR-126-3p        | 75 | 0.01±0.11  | 0.91 | 0.97 | 75       | -0.01±0.11       | 0.94        | 0.96        |
| miR-150-5p        | 76 | 0.02±0.22  | 0.93 | 0.97 | 31       | -0.22±0.26       | 0.39        | 0.94        |
| let-7b-5p         | 77 | -0.01±0.16 | 0.94 | 0.97 | 50       | 0.08±0.18        | 0.64        | 0.96        |
| miR-590-5p        | 78 | -0.01±0.13 | 0.96 | 0.98 | 8        | 0.23±0.15        | 0.13        | 0.94        |
| miR-20a-5p        | 79 | 0.01±0.12  | 0.97 | 0.98 | 14       | 0.16±0.12        | 0.2         | 0.94        |
| miR-181a-5p       | 80 | -0.01±0.43 | 0.98 | 0.98 | 49       | 0.23±0.49        | 0.64        | 0.96        |

Linear mixed effects model (hospital=random effect). A negative regression coefficient corresponds to a lower level of pre-treatment miRNA predictive of remission and vice versa. False discovery rate corrections for multiple testing (q-values) are based on the total number miRNAs analyzed per hypothesis (N=80). Feature-selected miRNAs (p<0.1) in bold. Abbreviations: hsa, homo sapiens; Regr. Coeff.,  $\beta$  regression coefficient; SE, standard error;

**Supplementary Figure 2. Circulating miRNA levels and change in DAS28 in all RA patients after 3 months treatment. Significant correlations of 7 miRNAs.**

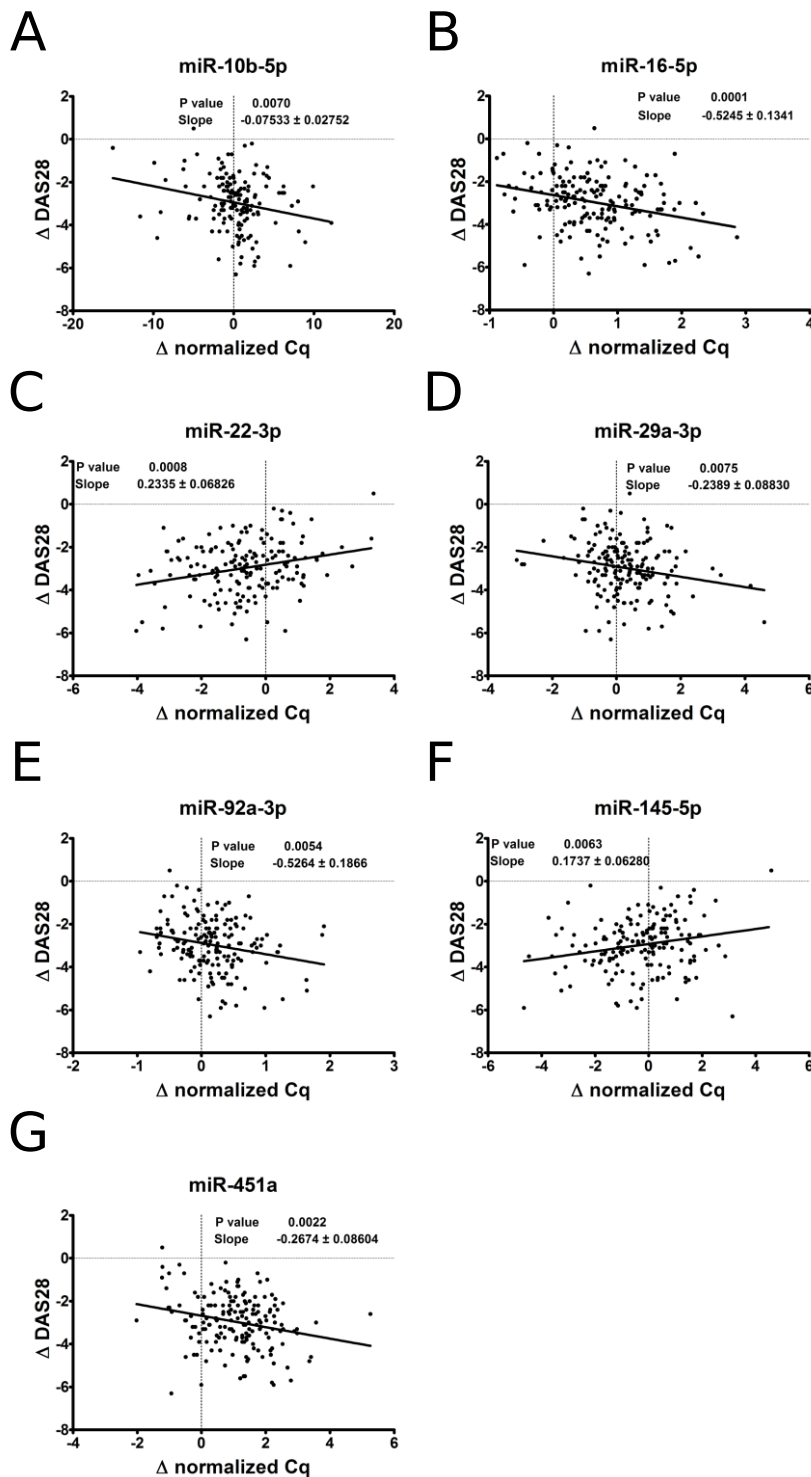



**Supplementary Table 7. Correlations between change in micro-RNA levels and change in DAS28**

| $\Delta$ miRNA | $\Delta$ DAS28 |                  |                          |             | $\Delta$ CRP |                          | $\Delta$ SJC |              | $\Delta$ TJC |              | $\Delta$ PG |              |
|----------------|----------------|------------------|--------------------------|-------------|--------------|--------------------------|--------------|--------------|--------------|--------------|-------------|--------------|
|                | Regr. Coeff.   | 95%CI            | p-value                  | q-value     | Corr.        | p-value                  | Corr.        | p-value      | Corr.        | p-value      | Corr.       | p-value      |
| miR-16-5p      | -0.52          | -0.26 -<br>-0.79 | <b>1*10<sup>-4</sup></b> | <b>0.01</b> | ↓            | <b>0.001</b>             | ↓            | <b>0.010</b> | ↓            | <b>0.005</b> | ↓           | <b>0.02</b>  |
| miR-22-3p      | 0.23           | 0.10<br>-0.10 -  | <b>8*10<sup>-4</sup></b> | <b>0.03</b> | ↑            | <b>7*10<sup>-5</sup></b> | ↑            | <b>0.007</b> | ↑            | <b>0.03</b>  | ↑           | <b>0.05</b>  |
| miR-451a       | -0.27          | -0.44<br>-0.16 - | <b>0.002</b>             | <b>0.06</b> | ↓            | <b>0.001</b>             |              | 0.26         |              | 0.22         | ↓           | <b>0.005</b> |
| miR-92a-3p     | -0.53          | -0.89<br>0.30 -  | <b>0.005</b>             | <b>0.09</b> |              | 0.31                     |              | 0.13         | ↓            | <b>0.05</b>  |             | 0.03         |
| miR-145-5p     | 0.17           | 0.05<br>-0.02 -  | <b>0.006</b>             | <b>0.09</b> | ↑            | <b>0.03</b>              |              | 0.28         |              | 0.14         |             | 0.11         |
| miR-10b-5p     | -0.08          | -0.13<br>-0.06 - | <b>0.007</b>             | <b>0.09</b> | ↓            | <b>0.006</b>             |              | 0.74         |              | 0.37         | ↓           | <b>0.004</b> |
| miR-29a-3p     | -0.24          | -0.41            | <b>0.008</b>             | <b>0.09</b> |              | 0.31                     |              | 0.30         |              | 0.05         |             | 0.05         |

Linear regression of  $\Delta$ miRNA (baseline minus 3-months value) and  $\Delta$ DAS28 (baseline minus 3-months value) – a positive coefficient represents a positive correlation between miRNA level and DAS28 score. Correlation between  $\Delta$ miRNA level and  $\Delta$  clinical variable: ↑ = positive correlation, ↓ = negative correlation. Abbreviations: DAS28, disease activity score across 28-joints; CRP, C-reactive protein; SJC, swollen joint count; TJC, tender joint count; PG, patient global VAS; Corr., correlation; Coeff., estimated coefficients; CI, confidence interval.

#### Reference List

- (1) Baek D, Villen J, Shin C, Camargo FD, Gygi SP, Bartel DP. The impact of microRNAs on protein output. *Nature* 2008; 455:64-71.
- (2) Iliopoulos D, Hirsch HA, Struhl K. An epigenetic switch involving NF-kappaB, Lin28, Let-7 MicroRNA, and IL6 links inflammation to cell transformation. *Cell* 2009; 139:693-706.
- (3) Kim SJ, Gregersen PK, Diamond B. Regulation of dendritic cell activation by microRNA let-7c and BLIMP1. *J Clin Invest* 2013; 123:823-33.
- (4) Androulidaki A, Iliopoulos D, Arranz A, Doxaki C, Schworer S, Zacharioudaki V et al. The kinase Akt1 controls macrophage response to lipopolysaccharide by regulating microRNAs. *Immunity* 2009; 31:220-31.
- (5) Chen XM, Splinter PL, O'Hara SP, LaRusso NF. A cellular micro-RNA, let-7i, regulates Toll-like receptor 4 expression and contributes to cholangiocyte immune responses against *Cryptosporidium parvum* infection. *J Biol Chem* 2007; 282:28929-38.
- (6) Fang Y, Shi C, Manduchi E, Civelek M, Davies PF. MicroRNA-10a regulation of proinflammatory phenotype in athero-susceptible endothelium in vivo and in vitro. *Proc Natl Acad Sci U S A* 2010; 107:13450-5.
- (7) Duroux-Richard I, Presumey J, Courties G, Gay S, Gordeladze J, Jorgensen C et al. MicroRNAs as new player in rheumatoid arthritis. *Joint Bone Spine* 2011; 78:17-22.
- (8) Li T, Morgan MJ, Choksi S, Zhang Y, Kim YS, Liu ZG. MicroRNAs modulate the noncanonical transcription factor NF-kappaB pathway by regulating expression of the kinase IKKalpha during macrophage differentiation. *Nat Immunol* 2010; 11:799-805.
- (9) Sullivan RP, Leong JW, Schneider SE, Keppel CR, Germino E, French AR et al. MicroRNA-deficient NK cells exhibit decreased survival but enhanced function. *J Immunol* 2012; 188:3019-30.
- (10) Murata K, Yoshitomi H, Tanida S, Ishikawa M, Nishitani K, Ito H et al. Plasma and synovial fluid microRNAs as potential biomarkers of rheumatoid arthritis and osteoarthritis. *Arthritis Res Ther* 2010; 12:R86.
- (11) Furer V, Greenberg JD, Attur M, Abramson SB, Pillinger MH. The role of microRNA in rheumatoid arthritis and other autoimmune diseases. *Clin Immunol* 2010.
- (12) Pauley KM, Cha S, Chan EK. MicroRNA in autoimmunity and autoimmune diseases. *J Autoimmun* 2009; 32:189-94.
- (13) O'Connell RM, Rao DS, Chaudhuri AA, Baltimore D. Physiological and pathological roles for microRNAs in the immune system. *Nat Rev Immunol* 2010; 10:111-22.

- (14) Philippe L, Alsaleh G, Suffert G, Meyer A, Georgel P, Sibilia J et al. TLR2 expression is regulated by microRNA miR-19 in rheumatoid fibroblast-like synoviocytes. *J Immunol* 2012; 188:454-61.
- (15) Te JL, Dozmorov IM, Guthridge JM, Nguyen KL, Cavett JW, Kelly JA et al. Identification of unique microRNA signature associated with lupus nephritis. *PLoS ONE* 2010; 5:e10344.
- (16) Fontana L, Pelosi E, Greco P, Racanicchi S, Testa U, Liuzzi F et al. MicroRNAs 17-5p-20a-106a control monocytopoiesis through AML1 targeting and M-CSF receptor upregulation. *Nat Cell Biol* 2007; 9:775-87.
- (17) Sheedy FJ, Palsson-McDermott E, Hennessy EJ, Martin C, O'Leary JJ, Ruan Q et al. Negative regulation of TLR4 via targeting of the proinflammatory tumor suppressor PDCD4 by the microRNA miR-21. *Nat Immunol* 2010; 11:141-7.
- (18) Lin J, Huo R, Xiao L, Zhu X, Xie J, Sun S et al. A novel p53/microRNA-22/Cyr61 axis in synovial cells regulates inflammation in rheumatoid arthritis. *Arthritis Rheumatol* 2014; 66:49-59.
- (19) Krintel SB, Dehlendorff C, Hetland ML, Horslev-Petersen K, Andersen KK, Junker P et al. Prediction of treatment response to adalimumab: a double-blind placebo-controlled study of circulating microRNA in patients with early rheumatoid arthritis. *Pharmacogenomics J* 2015.
- (20) Castro-Villegas C, Perez-Sanchez C, Escudero A, Filipescu I, Verdu M, Ruiz-Limon P et al. Circulating miRNAs as potential biomarkers of therapy effectiveness in rheumatoid arthritis patients treated with anti-TNFalpha. *Arthritis Res Ther* 2015; 17:49.
- (21) Zhu S, Pan W, Song X, Liu Y, Shao X, Tang Y et al. The microRNA miR-23b suppresses IL-17-associated autoimmune inflammation by targeting TAB2, TAB3 and IKK-alpha. *Nat Med* 2012; 18:1077-86.
- (22) Pivarcsi A, Meisgen F, Xu N, Stahle M, Sonkoly E. Changes in the level of serum microRNAs in patients with psoriasis after antitumour necrosis factor-alpha therapy. *Br J Dermatol* 2013; 169:563-70.
- (23) Gennarino VA, Sardiello M, Avellino R, Meola N, Maselli V, Anand S et al. MicroRNA target prediction by expression analysis of host genes. *Genome Res* 2009; 19:481-90.
- (24) Kim TD, Lee SU, Yun S, Sun HN, Lee SH, Kim JW et al. Human microRNA-27a\* targets Prf1 and GzmB expression to regulate NK-cell cytotoxicity. *Blood* 2011; 118:5476-86.
- (25) Min S, Li L, Zhang M, Zhang Y, Liang X, Xie Y et al. TGF-beta-associated miR-27a inhibits dendritic cell-mediated differentiation of Th1 and Th17 cells by TAB3, p38 MAPK, MAP2K4 and MAP2K7. *Genes Immun* 2012; 13:621-31.
- (26) Papadopoulou AS, Dooley J, Linterman MA, Pierson W, Ucar O, Kyewski B et al. The thymic epithelial microRNA network elevates the threshold for infection-associated thymic involution via miR-29a mediated suppression of the IFN-alpha receptor. *Nat Immunol* 2011; 13:181-7.
- (27) Smith KM, Guerau-de-Arellano M, Costinean S, Williams JL, Bottoni A, Mavrikis CG et al. miR-29ab1 deficiency identifies a negative feedback loop controlling Th1 bias that is dysregulated in multiple sclerosis. *J Immunol* 2012; 189:1567-76.

- (28) Jiao J, Herl LD, Farese RV, Gao FB. MicroRNA-29b regulates the expression level of human progranulin, a secreted glycoprotein implicated in frontotemporal dementia. *PLoS One* 2010; 5:e10551.
- (29) Hong Y, Wu J, Zhao J, Wang H, Liu Y, Chen T et al. miR-29b and miR-29c are involved in Toll-like receptor control of glucocorticoid-induced apoptosis in human plasmacytoid dendritic cells. *PLoS One* 2013; 8:e69926.
- (30) Hashimi ST, Fulcher JA, Chang MH, Gov L, Wang S, Lee B. MicroRNA profiling identifies miR-34a and miR-21 and their target genes JAG1 and WNT1 in the coordinate regulation of dendritic cell differentiation. *Blood* 2009; 114:404-14.
- (31) Carlsen AL, Schetter AJ, Nielsen CT, Lood C, Knudsen S, Voss A et al. Circulating microRNA expression profiles associated with systemic lupus erythematosus. *Arthritis Rheum* 2013; 65:1324-34.
- (32) Hu G, Zhou R, Liu J, Gong AY, Eischeid AN, Dittman JW et al. MicroRNA-98 and let-7 confer cholangiocyte expression of cytokine-inducible Src homology 2-containing protein in response to microbial challenge. *J Immunol* 2009; 183:1617-24.
- (33) Helwak A, Kudla G, Dudnakova T, Tollervey D. Mapping the human miRNA interactome by CLASH reveals frequent noncanonical binding. *Cell* 2013; 153:654-65.
- (34) Yu D, Tan AH, Hu X, Athanasopoulos V, Simpson N, Silva DG et al. Roquin represses autoimmunity by limiting inducible T-cell co-stimulator messenger RNA. *Nature* 2007; 450:299-303.
- (35) Benakanakere MR, Li Q, Eskan MA, Singh AV, Zhao J, Galicia JC et al. Modulation of TLR2 protein expression by miR-105 in human oral keratinocytes. *J Biol Chem* 2009; 284:23107-15.
- (36) Linsley PS, Schelter J, Burchard J, Kibukawa M, Martin MM, Bartz SR et al. Transcripts targeted by the microRNA-16 family cooperatively regulate cell cycle progression. *Mol Cell Biol* 2007; 27:2240-52.
- (37) Wang WX, Wilfred BR, Madathil SK, Tang G, Hu Y, Dimayuga J et al. miR-107 regulates granulin/progranulin with implications for traumatic brain injury and neurodegenerative disease. *Am J Pathol* 2010; 177:334-45.
- (38) Kim SW, Ramasamy K, Bouamar H, Lin AP, Jiang D, Aguiar RC. MicroRNAs miR-125a and miR-125b constitutively activate the NF-kappaB pathway by targeting the tumor necrosis factor alpha-induced protein 3 (TNFAIP3, A20). *Proc Natl Acad Sci U S A* 2012; 109:7865-70.
- (39) Tili E, Michaille JJ, Cimino A, Costinean S, Dumitru CD, Adair B et al. Modulation of miR-155 and miR-125b levels following lipopolysaccharide/TNF-alpha stimulation and their possible roles in regulating the response to endotoxin shock. *J Immunol* 2007; 179:5082-9.
- (40) Semaan N, Frenzel L, Alsaleh G, Suffert G, Gottenberg JE, Sibilia J et al. miR-346 controls release of TNF-alpha protein and stability of its mRNA in rheumatoid arthritis via tristetraprolin stabilization. *PLoS ONE* 2011; 6:e19827.

- (41) Grimson A, Farh KK, Johnston WK, Garrett-Engele P, Lim LP, Bartel DP. MicroRNA targeting specificity in mammals: determinants beyond seed pairing. *Mol Cell* 2007; 27:91-105.
- (42) Acosta-Colman I, Palau NF, Tornero JF, Fernandez-Nebro AF, Blanco FF, Gonzalez-Alvaro IF et al. GWAS replication study confirms the association of PDE3A-SLCO1C1 with anti-TNF therapy response in rheumatoid arthritis. *Pharmacogenomics* 2013; 14:727-34.
- (43) Bandyopadhyay S, Lane T, Venugopal R, Parthasarathy PT, Cho Y, Galam L et al. MicroRNA-133a-1 regulates inflammasome activation through uncoupling protein-2. *Biochem Biophys Res Commun* 2013; 439:407-12.
- (44) Nakamachi Y, Kawano S, Takenokuchi M, Nishimura K, Sakai Y, Chin T et al. MicroRNA-124a is a key regulator of proliferation and monocyte chemoattractant protein 1 secretion in fibroblast-like synoviocytes from patients with rheumatoid arthritis. *Arthritis & Rheumatism* 2009; 60:1294-304.
- (45) Starczynowski DT, Kuchenbauer F, Argiropoulos B, Sung S, Morin R, Muranyi A et al. Identification of miR-145 and miR-146a as mediators of the 5q- syndrome phenotype. *Nat Med* 2010; 16:49-58.
- (46) Lu MC, Lai NS, Chen HC, Yu HC, Huang KY, Tung CH et al. Decreased microRNA(miR)-145 and increased miR-224 expression in T cells from patients with systemic lupus erythematosus involved in lupus immunopathogenesis. *Clin Exp Immunol* 2013; 171:91-9.
- (47) Yang K, He YS, Wang XQ, Lu L, Chen QJ, Liu J et al. MiR-146a inhibits oxidized low-density lipoprotein-induced lipid accumulation and inflammatory response via targeting toll-like receptor 4. *FEBS Lett* 2011; 585:854-60.
- (48) Nahid MA, Satoh M, Chan EK. Mechanistic role of microRNA-146a in endotoxin-induced differential cross-regulation of TLR signaling. *J Immunol* 2011; 186:1723-34.
- (49) Liu G, Friggeri A, Yang Y, Park YJ, Tsuruta Y, Abraham E. miR-147, a microRNA that is induced upon Toll-like receptor stimulation, regulates murine macrophage inflammatory responses. *Proc Natl Acad Sci U S A* 2009; 106:15819-24.
- (50) Huang RS, Hu GQ, Lin B, Lin ZY, Sun CC. MicroRNA-155 silencing enhances inflammatory response and lipid uptake in oxidized low-density lipoprotein-stimulated human THP-1 macrophages. *J Investig Med* 2010; 58:961-7.
- (51) Li QJ, Chau J, Ebert PJ, Sylvester G, Min H, Liu G et al. miR-181a is an intrinsic modulator of T cell sensitivity and selection. *Cell* 2007; 129:147-61.
- (52) Steen SO, Iversen LV, Carlsen AL, Burton M, Nielsen CT, Jacobsen S et al. The circulating cell-free microRNA profile in systemic sclerosis is distinct from both healthy controls and systemic lupus erythematosus. *J Rheumatol* 2015; 42:214-21.
- (53) Geng L, Chaudhuri A, Talmon G, Wisecarver JL, Are C, Brattain M et al. MicroRNA-192 suppresses liver metastasis of colon cancer. *Oncogene* 2014; 33:5332-40.
- (54) Chen R, Alvero AB, Silasi DA, Kelly MG, Fest S, Visintin I et al. Regulation of IKKbeta by miR-199a affects NF-kappaB activity in ovarian cancer cells. *Oncogene* 2008; 27:4712-23.

- (55) Naghavian R, Ghaedi K, Kiani-Esfahani A, Ganjalikhani-Hakemi M, Etemadifar M, Nasr-Esfahani MH. miR-141 and miR-200a, Revelation of New Possible Players in Modulation of Th17/Treg Differentiation and Pathogenesis of Multiple Sclerosis. *PLoS One* 2015; 10:e0124555.
- (56) Wendlandt EB, Graff JW, Gioannini TL, McCaffrey AP, Wilson ME. The role of microRNAs miR-200b and miR-200c in TLR4 signaling and NF-kappaB activation. *Innate Immun* 2012; 18:846-55.
- (57) Yu H, Lu J, Zuo L, Yan Q, Yu Z, Li X et al. Epstein-Barr virus downregulates microRNA 203 through the oncoprotein latent membrane protein 1: a contribution to increased tumor incidence in epithelial cells. *J Virol* 2012; 86:3088-99.
- (58) Wei J, Huang X, Zhang Z, Jia W, Zhao Z, Zhang Y et al. MyD88 as a target of microRNA-203 in regulation of lipopolysaccharide or Bacille Calmette-Guerin induced inflammatory response of macrophage RAW264.7 cells. *Mol Immunol* 2013; 55:303-9.
- (59) Tang X, Tian X, Zhang Y, Wu W, Tian J, Rui K et al. Correlation between the frequency of Th17 cell and the expression of microRNA-206 in patients with dermatomyositis. *Clin Dev Immunol* 2013; 2013:345347.
- (60) Song L, Huang Q, Chen K, Liu L, Lin C, Dai T et al. miR-218 inhibits the invasive ability of glioma cells by direct downregulation of IKK-beta. *Biochem Biophys Res Commun* 2010; 402:135-40.
- (61) El GM, McCall CE. MicroRNAs distinguish translational from transcriptional silencing during endotoxin tolerance. *J Biol Chem* 2010; 285:20940-51.
- (62) Chen S, Sun B. Negative regulation of NLRP3 inflammasome signaling. *Protein Cell* 2013; 4:251-8.
- (63) Tavazoie SF, Alarcon C, Oskarsson T, Padua D, Wang Q, Bos PD et al. Endogenous human microRNAs that suppress breast cancer metastasis. *Nature* 2008; 451:147-52.
- (64) Alsaleh G, Suffert G, Semaan N, Juncker T, Frenzel L, Gottenberg JE et al. Bruton's tyrosine kinase is involved in miR-346-related regulation of IL-18 release by lipopolysaccharide-activated rheumatoid fibroblast-like synoviocytes. *J Immunol* 2009; 182:5088-97.
- (65) Li J, Wan Y, Guo Q, Zou L, Zhang J, Fang Y et al. Altered microRNA expression profile with miR-146a upregulation in CD4+ T cells from patients with rheumatoid arthritis. *Arthritis Res Ther* 2010; 12:R81.
- (66) Tsukamoto Y, Nakada C, Noguchi T, Tanigawa M, Nguyen LT, Uchida T et al. MicroRNA-375 is downregulated in gastric carcinomas and regulates cell survival by targeting PDK1 and 14-3-3zeta. *Cancer Res* 2010; 70:2339-49.
- (67) Li H, Zhao H, Xue F, Zhang X, Zhang D, Ge J et al. Reduced expression of MIR409-3p in primary immune thrombocytopenia. *Br J Haematol* 2013; 161:128-35.
- (68) Murata K, Yoshitomi H, Furu M, Ishikawa M, Shibuya H, Ito H et al. MicroRNA-451 down-regulates neutrophil chemotaxis via p38 MAPK. *Arthritis Rheumatol* 2014; 66:549-59.
- (69) Wang H, Peng W, Ouyang X, Li W, Dai Y. Circulating microRNAs as candidate biomarkers in patients with systemic lupus erythematosus. *Transl Res* 2012; 160:198-206.

Online supplement to: Plasma MicroRNA Profiles in Patients with Early Rheumatoid Arthritis Responding to Adalimumab plus Methotrexate vs Methotrexate Alone: A Placebo-controlled Clinical Trial. *The Journal of Rheumatology*. doi:10.3899/jrheum.170266

- (70) Smigielska-Czepiel K, van den Berg A, Jellema P, van der Lei RJ, Bijzet J, Kluiver J et al. Comprehensive analysis of miRNA expression in T-cell subsets of rheumatoid arthritis patients reveals defined signatures of naive and memory Tregs. *Genes Immun* 2014; 15:115-25.
- (71) Shan H, Zhang Y, Lu Y, Zhang Y, Pan Z, Cai B et al. Downregulation of miR-133 and miR-590 contributes to nicotine-induced atrial remodelling in canines. *Cardiovasc Res* 2009; 83:465-72.
- (72) Dai Y, Huang YS, Tang M, Lv TY, Hu CX, Tan YH et al. Microarray analysis of microRNA expression in peripheral blood cells of systemic lupus erythematosus patients. *Lupus* 2007; 16:939-46.
- (73) Rademakers R, Eriksen JL, Baker M, Robinson T, Ahmed Z, Lincoln SJ et al. Common variation in the miR-659 binding-site of GRN is a major risk factor for TDP43-positive frontotemporal dementia. *Hum Mol Genet* 2008; 17:3631-42.
